# Supplementary material for: TaxoNN: ensemble of neural networks on stratified microbiome data for disease prediction
Source: PubMed Central journal article supplement — Bioinformatics. 2020 May 25;36(17):4544–50. doi: 10.1093/bioinformatics/btaa542 (PMC7750934; doi:10.1093/bioinformatics/btaa542), 2020-05-25
Supplement: btaa542_supplementary_data.pdf [file btaa542_supplementary_data.pdf]

# Supplementary Material for ‘TaxoNN: Ensemble of Neural Networks on Stratified Microbiome Data for Disease Prediction’

## Contents

|          |                                                                    |           |
|----------|--------------------------------------------------------------------|-----------|
| <b>1</b> | <b>Supplementary Tables</b>                                        | <b>6</b>  |
| 1.0.1    | Analysis of changes in CNN parameters . . . . .                    | 6         |
| 1.0.2    | Analysing effect of interaction terms . . . . .                    | 20        |
| 1.0.3    | Validation on external cohort . . . . .                            | 22        |
| 1.0.4    | Stratification based on class level in the taxonomy tree . . . . . | 24        |
| <b>2</b> | <b>Supplementary Figures</b>                                       | <b>25</b> |
| 2.0.1    | Robustness in imbalance of case and controls . . . . .             | 36        |
| <b>3</b> | <b>References</b>                                                  | <b>46</b> |

## List of Tables

|   |                                                                                                                                                                                                                                                                                                                                                                                                                  |   |
|---|------------------------------------------------------------------------------------------------------------------------------------------------------------------------------------------------------------------------------------------------------------------------------------------------------------------------------------------------------------------------------------------------------------------|---|
| 1 | Results evaluating performance of our model by changing network parameters on the simulated data. The boldfaced attributes represent the parameter values for which the model performs the best. . . . .                                                                                                                                                                                                         | 6 |
| 2 | Table detailing the clusters in the T2D study [1] based on the phyla containing maximum number of OTUs. The right handside represents the genera in each cluster. The numbering provided to each genus provides a unique identifier to each OTU which is further used in Heatmaps as labels for the x and y axis, in Supplementary Figure 13, 14 and 15 to illustrate the correlations between the OTUs. . . . . | 8 |

|   |                                                                                                                                                                                                                                                                                                                                                                                                                        |    |
|---|------------------------------------------------------------------------------------------------------------------------------------------------------------------------------------------------------------------------------------------------------------------------------------------------------------------------------------------------------------------------------------------------------------------------|----|
| 3 | Table detailing the clusters in the Cirrhosis study [2] based on the phyla containing maximum number of OTUs. The right handside represents the genera in each cluster. The numbering provided to each genus provides a unique identifier to each OTU which is further used in Heatmaps as labels for the x and y axis, in Supplementary Figure 16, 17 and 18 to illustrate the correlations between the OTUs. . . . . | 14 |
| 4 | Association of age and sex to outcome of disease status in the T2D and Cirrhosis studies. . . . .                                                                                                                                                                                                                                                                                                                      | 19 |
| 5 | AUC values tabulated for various machine learning methods on test set of simulation studies. The results are reported on considering model performance without (w/o) interactions and with interactions. Note that the last row shows the consistent improvement in the performance of the proposed model <i>taxoNN<sub>corr</sub></i> for both scenarios. . . . .                                                     | 20 |
| 6 | Mean AUC values tabulated for various machine learning methods on training set of T2D and Cirrhosis studies. The results are reported on considering 10 times 10-fold cross-validation on both studies. Note that the last row shows the consistent improvement in the performance of the proposed model <i>taxoNN<sub>corr</sub></i> for both studies. . . . .                                                        | 21 |
| 7 | Association of age and metformin to outcome of disease status in the T2D II study                                                                                                                                                                                                                                                                                                                                      | 22 |
| 8 | AUC values tabulated for various machine learning methods on T2D II study. The results are reported considering model performance using only OTU data and with metformin information as a covariate alongwith OTU data. Note that the last row (values in bold) shows the consistent improvement in the performance of the proposed model <i>taxoNN<sub>corr</sub></i> for both cases. . . . .                         | 23 |
| 9 | AUC values tabulated for various machine learning methods upon class based stratification for T2D and Cirrhosis studies. . . . .                                                                                                                                                                                                                                                                                       | 24 |

**List of Figures**

|   |                                                                                                                                  |    |
|---|----------------------------------------------------------------------------------------------------------------------------------|----|
| 1 | Example of taxonomy levels in the OTU data illustrated using 29 OTUs taken from the OTU data publicly available in [3] . . . . . | 26 |
|---|----------------------------------------------------------------------------------------------------------------------------------|----|

|    |                                                                                                                                                                                                                                                                                                                                                                                                                                                                                                                |    |
|----|----------------------------------------------------------------------------------------------------------------------------------------------------------------------------------------------------------------------------------------------------------------------------------------------------------------------------------------------------------------------------------------------------------------------------------------------------------------------------------------------------------------|----|
| 2  | OTU clustering in a) T2D study (208 OTUs) b) Cirrhosis study (184 OTUs). Outer circle represents the OTUs at the genus level for each cluster. Note that in both studies Proteobacteria, Actinobacteria and Firmicutes played as the phyla with highest number of OTUs in a single phylum, leading to forming the three major clusters for <i>taxoNN</i> . . . . .                                                                                                                                             | 27 |
| 3  | Boxplot illustrating relative abundance percentage of OTUs in each phylum of the T2D study. The upper whisker extends from the hinge to the largest value no further than $1.5 * IQR$ from the hinge (where IQR is the inter-quartile range, or distance between the first and third quartiles). The lower whisker extends from the hinge to the smallest value at most $1.5 * IQR$ of the hinge. Data beyond the end of the whiskers are called "outlying" points and are plotted individually. . . . .       | 28 |
| 4  | Relative abundance percentage of OTUs at genus level in the Firmicutes phylum of the T2D study . . . . .                                                                                                                                                                                                                                                                                                                                                                                                       | 29 |
| 5  | Relative abundance percentage of OTUs at genus level in the Proteobacteria phylum of the T2D study . . . . .                                                                                                                                                                                                                                                                                                                                                                                                   | 30 |
| 6  | Relative abundance percentage of OTUs at genus level in the Actinobacteria phylum of the T2D study . . . . .                                                                                                                                                                                                                                                                                                                                                                                                   | 31 |
| 7  | Boxplot illustrating relative abundance percentage of OTUs in each phylum of the Cirrhosis study. The upper whisker extends from the hinge to the largest value no further than $1.5 * IQR$ from the hinge (where IQR is the inter-quartile range, or distance between the first and third quartiles). The lower whisker extends from the hinge to the smallest value at most $1.5 * IQR$ of the hinge. Data beyond the end of the whiskers are called "outlying" points and are plotted individually. . . . . | 32 |
| 8  | Relative abundance percentage of OTUs at genus level in the Firmicutes phylum of the Cirrhosis study . . . . .                                                                                                                                                                                                                                                                                                                                                                                                 | 33 |
| 9  | Relative abundance percentage of OTUs at genus level in the Proteobacteria phylum of the Cirrhosis study . . . . .                                                                                                                                                                                                                                                                                                                                                                                             | 34 |
| 10 | Relative abundance percentage of OTUs at genus level in the Actinobacteria phylum of the Cirrhosis study . . . . .                                                                                                                                                                                                                                                                                                                                                                                             | 35 |

|    |                                                                                                                                                                                                                                                                                                                                                                                                                                                                                                                                                                                                                                                                                                                                                                               |    |
|----|-------------------------------------------------------------------------------------------------------------------------------------------------------------------------------------------------------------------------------------------------------------------------------------------------------------------------------------------------------------------------------------------------------------------------------------------------------------------------------------------------------------------------------------------------------------------------------------------------------------------------------------------------------------------------------------------------------------------------------------------------------------------------------|----|
| 11 | Analysing performance of model in the scenario of case and control imbalance in the simulated data. a) Case and control data is properly balanced with 200 cases and controls each. b) Case and control ratio increasing to 1:2 c) 200 cases to 600 controls d) 1:4 ratio between case and control samples . . . . .                                                                                                                                                                                                                                                                                                                                                                                                                                                          | 37 |
| 12 | An example plot to illustrate Euclidean distance based ordering in the OTUs in a cluster. (a) relative abundance of 21 OTUs for 3 subjects represented as blue dots. (b) red dot represents the medoid of the cluster. (c) black dashed lines represent the Euclidean distance of three OTUs from the medoid. As $d_i$ is the smallest followed by $d_j$ and $d_k$ , therefore, OTU with distance $d_i$ will be ordered first in the cluster as compared to OTU with distance $d_j$ , followed by OTU with distance $d_k$ . For the ease of understanding, this illustration is an example for only 3 subjects. However, in reality, there are multiple individuals (sample size = I) in a study leading to this 3-D plot being extended into an I-Dimensional space. . . . . | 38 |
| 13 | Heatmaps for the Spearman rank of the OTUs in the cluster, Phylum Firmicutes, (a) before ordering and (b) after the ordering based on correlation of the OTUs in the T2D study . . . . .                                                                                                                                                                                                                                                                                                                                                                                                                                                                                                                                                                                      | 39 |
| 14 | Heatmaps for the Spearman rank of the OTUs in the cluster, Phylum Proteobacteria, (a) before ordering and (b) after the ordering based on correlation of the OTUs in the T2D study . . . . .                                                                                                                                                                                                                                                                                                                                                                                                                                                                                                                                                                                  | 40 |
| 15 | Heatmaps for the Spearman rank of the OTUs in the cluster, Phylum Actinobacteria, (a) before ordering and (b) after the ordering based on correlation of the OTUs in the T2D study . . . . .                                                                                                                                                                                                                                                                                                                                                                                                                                                                                                                                                                                  | 41 |
| 16 | Heatmaps for the Spearman rank of the OTUs in the cluster, Phylum Firmicutes, (a) before ordering and (b) after the ordering based on correlation correlation of the OTUs in the Cirrhosis study . . . . .                                                                                                                                                                                                                                                                                                                                                                                                                                                                                                                                                                    | 42 |
| 17 | Heatmaps for the Spearman rank of the OTUs in the cluster, Phylum Proteobacteria, (a) before ordering and (b) after the ordering based on correlation correlation of the OTUs in the Cirrhosis study . . . . .                                                                                                                                                                                                                                                                                                                                                                                                                                                                                                                                                                | 43 |
| 18 | Heatmaps for the Spearman rank of the OTUs in the cluster, Phylum Actinobacteria, (a) before ordering and (b) after the ordering based on correlation correlation of the OTUs in the Cirrhosis study . . . . .                                                                                                                                                                                                                                                                                                                                                                                                                                                                                                                                                                | 44 |

- 19 Functional working of the layers of *taxoNN* on 4 clusters of an example dataset containing 'p', 'q', 'r' and 's' OTUs in the respective clusters (where  $p+q+r+s = N$ ). Each block corresponds to a layer acting on the cluster. Input signifies the dimension of the input to the layer. The input at each step is represented as (k,l) where, 'k' is the number of rows in the input and 'l' represents the number of columns. As the initial input was a vector therefore, l in this case was '1'. Output signifies the dimension of the result after certain operations in that particular layer. Further, as the number of filters increases from 32 in the first Conv layer to 64 in the second Conv layer, the number of columns in the nodes vary from 32 to 64. Finally, in the concatenation step we obtain a single column concatenation vector by stacking flattened vectors from all clusters together. . . . . 45

## 1 Supplementary Tables

### 1.0.1 Analysis of changes in CNN parameters

Supplementary Table 1: Results evaluating performance of our model by changing network parameters on the simulated data. The boldfaced attributes represent the parameter values for which the model performs the best.

| Performance Analysis                        |           |              |
|---------------------------------------------|-----------|--------------|
| Parameter                                   | Values    | AUC          |
| Stride Size                                 | <b>1</b>  | <b>0.887</b> |
|                                             | 2         | 0.853        |
|                                             | 3         | 0.822        |
|                                             | 4         | 0.812        |
|                                             | 5         | 0.800        |
| Window Size                                 | 3         | 0.834        |
|                                             | 4         | 0.851        |
|                                             | <b>5</b>  | <b>0.886</b> |
|                                             | 6         | 0.857        |
|                                             | 7         | 0.842        |
| No. of filters                              | 16        | 0.842        |
|                                             | <b>32</b> | <b>0.877</b> |
|                                             | 64        | 0.852        |
| No. of OTUs associated with risk of disease | 8         | 0.792        |
|                                             | 16        | 0.837        |
|                                             | <b>32</b> | <b>0.872</b> |

We tried to compare the performance of our CNN model by changing the parameters associated with the network such as, stride size, number of causal OTUs, number of filters and window size to see if accuracy improves. Results are shown in the Supplementary Table 1. It was observed that as we increased the stride size (the number by which the window slides) in the CNN network, the model performance reduced, as the correlations between some of the adjacent OTUs were dropped in each slide. We obtained the best performance when stride size was 1 (AUC=0.887). Increasing the window size on the other hand, increased the AUC value as we observed mean AUC value reaching a high of 0.886 on window size 5. But as we went on increasing the window size, we noticed a drop in performance. Similarly, we chose the number of filters in the CNN model in a standard manner as suggested in [4]. As already discussed, filters are equal to the number of features in every layer of the network. We obtained an AUC of 0.877 with 32 filters, however, when we increased the number of filters from 32 to 64 we observed that the performance dropped. Finally by changing the number of OTUs associated with risk of disease in the model, we observed the best AUC with 32 associated OTUs (AUC=0.872) and decreasing the number of associated

OTUs reduced the prediction performance.

Supplementary Table 2: Table detailing the clusters in the T2D study [1] based on the phyla containing maximum number of OTUs. The right handside represents the genera in each cluster. The numbering provided to each genus provides a unique identifier to each OTU which is further used in Heatmaps as labels for the x and y axis, in Supplementary Figure 13, 14 and 15 to illustrate the correlations between the OTUs.

| OTUs in T2D study |              |                                                                                                                                                                                                                                                                                                                                                                                                                                                                                                                                                                                                                                                                                                                                                                                                                                                                                                        |
|-------------------|--------------|--------------------------------------------------------------------------------------------------------------------------------------------------------------------------------------------------------------------------------------------------------------------------------------------------------------------------------------------------------------------------------------------------------------------------------------------------------------------------------------------------------------------------------------------------------------------------------------------------------------------------------------------------------------------------------------------------------------------------------------------------------------------------------------------------------------------------------------------------------------------------------------------------------|
| Cluster           | Phylum       | Genus                                                                                                                                                                                                                                                                                                                                                                                                                                                                                                                                                                                                                                                                                                                                                                                                                                                                                                  |
| Cluster 1         | p_Firmicutes | 1. g_Abiotrophia<br>2. g_Acidaminococcaceae_unclassified<br>3. g_Acidaminococcus<br>4. g_Alicyclobacillus<br>5. g_Allobaculum<br>6. g_Anaerococcus<br>7. g_Anaerofustis<br>8. g_Anaeroglobus<br>9. g_Anaerostipes<br>10. g_Anaerotruncus<br>11. g_Bacillus<br>12. g_Blautia<br>13. g_Bulleidia<br>14. g_Butyricoccus<br>15. g_Butyrivibrio<br>16. g_Catenibacterium<br>17. g_Cellulosilyticum<br>18. g_Clostridiaceae_noname<br>19. g_Clostridiales_Family_XIII_Incertae_Sedis_noname<br>20. g_Clostridiales_Family_XIII_Incertae_Sedis_unclassified<br>21. g_Clostridiales_noname<br>22. g_Clostridium<br>23. g_Coprobacillus<br>24. g_Coprococcus<br>25. g_Dialister<br>26. g_Dorea<br>27. g_Eggerthia<br>28. g_Enterococcus<br>29. g_Erysipelotrichaceae_noname<br>30. g_Eubacterium<br>31. g_Faecalibacterium<br>32. g_Finegoldia<br>33. g_Flavonifractor<br>34. g_Gemella<br>35. g_Granulicatella |



|           |                  |                                                                                                                                                                                                                                                                                                                                                                                                                                                                                                                                                                                                                                                                                                                                                                                                                      |
|-----------|------------------|----------------------------------------------------------------------------------------------------------------------------------------------------------------------------------------------------------------------------------------------------------------------------------------------------------------------------------------------------------------------------------------------------------------------------------------------------------------------------------------------------------------------------------------------------------------------------------------------------------------------------------------------------------------------------------------------------------------------------------------------------------------------------------------------------------------------|
|           |                  | 36. g_Holdemania<br>37. g_Lachnoanaerobaculum<br>38. g_Lachnospiraceae_noname<br>39. g_Lactobacillus<br>40. g_Lactococcus<br>41. g_Leuconostoc<br>42. g_Marvinbryantia<br>43. g_Megamonas<br>44. g_Megasphaera<br>45. g_Mitsuokella<br>46. g_Oribacterium<br>47. g_Oscillibacter<br>48. g_Parvimonas<br>49. g_Pediococcus<br>50. g_Peptoniphilus<br>51. g_Peptostreptococcaceae_noname<br>52. g_Peptostreptococcus<br>53. g_Phascolarctobacterium<br>54. g_Pseudoflavonifractor<br>55. g_Pseudoramibacter<br>56. g_Roseburia<br>57. g_Ruminococcaceae_noname<br>58. g_Ruminococcus<br>59. g_Selenomonas<br>60. g_Shuttleworthia<br>61. g_Solobacterium<br>62. g_Staphylococcus<br>63. g_Stomatobaculum<br>64. g_Streptococcus<br>65. g_Subdoligranulum<br>66. g_Turicibacter<br>67. g_Veillonella<br>68. g_Weissella |
| Cluster 2 | p_Proteobacteria | 69. g_Acinetobacter<br>70. g_Actinobacillus<br>71. g_Aeromonas<br>72. g_Aggregatibacter<br>73. g_Bartonella<br>74. g_Bilophila<br>75. g_Brevundimonas<br>76. g_Buchnera<br>77. g_Burkholderia                                                                                                                                                                                                                                                                                                                                                                                                                                                                                                                                                                                                                        |

78. g\_Burkholderiales\_noname
79. g\_Campylobacter
80. g\_Candidatus\_Zinderia
81. g\_Cardiobacteriaceae\_unclassified
82. g\_Caulobacter
83. g\_Chromobacterium
84. g\_Citrobacter
85. g\_Citromicrobium
86. g\_Comamonas
87. g\_Cronobacter
88. g\_Cupriavidus
89. g\_Desulfovibrio
90. g\_Enhydrobacter
91. g\_Enterobacter
92. g\_Enterobacteriaceae\_noname
93. g\_Erythrobacteraceae\_unclassified
94. g\_Escherichia
95. g\_Gallionellaceae\_unclassified
96. g\_Haemophilus
97. g\_Halomonas
98. g\_Helicobacter
99. g\_Kingella
100. g\_Klebsiella
101. g\_Lautropia
102. g\_Limnohabitans
103. g\_Mesorhizobium
104. g\_Morganella
105. g\_Neisseria
106. g\_Oxalobacter
107. g\_Pantoea
108. g\_Paracoccus
109. g\_Parasutterella
110. g\_Plesiomonas
111. g\_Polaromonas
112. g\_Proteus
113. g\_Providencia
114. g\_Pseudoalteromonadaceae\_unclassified
115. g\_Pseudoalteromonas
116. g\_Pseudomonas
117. g\_Pseudoxanthomonas
118. g\_Raoultella
119. g\_Rheinheimera

|           |                  |                                                                                                                                                                                                                                                                                                                                                                                                                                                                                                                                                                                                                                         |
|-----------|------------------|-----------------------------------------------------------------------------------------------------------------------------------------------------------------------------------------------------------------------------------------------------------------------------------------------------------------------------------------------------------------------------------------------------------------------------------------------------------------------------------------------------------------------------------------------------------------------------------------------------------------------------------------|
|           |                  | 120. g_Rhodanobacter<br>121. g_Rhodobiaceae_unclassified<br>122. g_Serratia<br>123. g_Shewanella<br>124. g_Shigella<br>125. g_Shinella<br>126. g_Sinobacteraceae_unclassified<br>127. g_Sphingobium<br>128. g_Sphingopyxis<br>129. g_Spiribacter<br>130. g_Succinatimonas<br>131. g_Sutterella<br>132. g_Sutterellaceae_unclassified<br>133. g_Variovorax<br>134. g_Vibrio<br>135. g_Xanthomonas<br>136. g_Yersinia                                                                                                                                                                                                                     |
| Cluster 3 | p_Actinobacteria | 137. g_Actinomyces<br>138. g_Adlercreutzia<br>139. g_Agromyces<br>140. g_Alloscardovia<br>141. g_Atopobium<br>142. g_Bifidobacterium<br>143. g_Brachybacterium<br>144. g_Brevibacterium<br>145. g_Collinsella<br>146. g_Coriobacteriaceae_noname<br>147. g_Corynebacterium<br>148. g_Cryptobacterium<br>149. g_Dermatophilaceae_unclassified<br>150. g_Eggerthella<br>151. g_Gardnerella<br>152. g_Gordonibacter<br>153. g_Kocuria<br>154. g_Leifsonia<br>155. g_Leucobacter<br>156. g_Microlunatus<br>157. g_Mobiluncus<br>158. g_Nocardioides<br>159. g_Olsenella<br>160. g_Parascardovia<br>161. g_Propionibacteriaceae_unclassified |

|           |                                                                                                                                                                                                                                                   |                                                                                                                                                                                                                                                                                                                                                                                                                                                                                                                                                                                                                                                                                                                                                                                                                                                                                         |
|-----------|---------------------------------------------------------------------------------------------------------------------------------------------------------------------------------------------------------------------------------------------------|-----------------------------------------------------------------------------------------------------------------------------------------------------------------------------------------------------------------------------------------------------------------------------------------------------------------------------------------------------------------------------------------------------------------------------------------------------------------------------------------------------------------------------------------------------------------------------------------------------------------------------------------------------------------------------------------------------------------------------------------------------------------------------------------------------------------------------------------------------------------------------------------|
|           |                                                                                                                                                                                                                                                   | 162. g_Propionibacterium<br>163. g_Rothia<br>164. g_Scardovia<br>165. g_Slackia<br>166. g_Tropheryma<br>167. g_Varibaculum                                                                                                                                                                                                                                                                                                                                                                                                                                                                                                                                                                                                                                                                                                                                                              |
| Cluster 4 | 1. p_Spirochaetes<br>2. p_Synergistetes<br>3. p_Tenericutes<br>4.<br>p_Verrucomicrobia<br>5. p_Bacteroidetes<br>6. p_Candidatus<br>_Saccharibacteria<br>7. p_Chlorobi<br>8. p_Deinococcus<br>_Thermus<br>9. p_Acidobacteria<br>10. p_Fusobacteria | 168. g_Brachyspira<br>169. g_Fretibacterium<br>170. g_Pyramidobacter<br>171. g_Synergistes<br><br>172. g_Mycoplasma<br>173. g_Akkermansia<br><br>174. g_Naumovozyma<br>175. g_Saccharomyces<br><br>176. g_Saccharomycetaceae_unclassified<br>177. g_Alistipes<br>178. g_Alloprevotella<br>179. g_Bacteroidales_noname<br>180. g_Bacteroides<br>181. g_Bacteroidetes_noname<br>182. g_Barnesiella<br>183. g_Butyricimonas<br>184. g_Cellulophaga<br>185. g_Coprobacter<br>186. g_Dysgonomonas<br>187. g_Odoribacter<br>188. g_Parabacteroides<br>189. g_Paraprevotella<br>190. g_Pedobacter<br>191. g_Porphyrromonas<br>192. g_Prevotella<br>193. g_Riemerella<br>194. g_Sphingobacterium<br>195. g_Zunongwangia<br>196. g_Candidatus_Saccharibacteria_noname<br>197. g_Candidatus_Saccharibacteria_noname_unclassified<br>198. g_Chlorobium<br>199. g_Deinococcus<br>200. g_Meiothermus |

- |  |                                                                                                                                                                                                                                                                                                                                      |
|--|--------------------------------------------------------------------------------------------------------------------------------------------------------------------------------------------------------------------------------------------------------------------------------------------------------------------------------------|
|  | <ol style="list-style-type: none"><li>201. g_Methanocaldococcaceae_unclassified</li><li>202. g_Acidobacteriaceae_unclassified</li><li>203. g_Granulicella</li><li>204. g_Cetobacterium</li><li>205. g_Fusobacterium</li><li>206. g_Leptotrichia</li><li>207. g_Leptotrichiaceae_unclassified</li><li>208. g_Rhodopirellula</li></ol> |
|--|--------------------------------------------------------------------------------------------------------------------------------------------------------------------------------------------------------------------------------------------------------------------------------------------------------------------------------------|

Supplementary Table 3: Table detailing the clusters in the Cirrhosis study [2] based on the phyla containing maximum number of OTUs. The right handside represents the genera in each cluster. The numbering provided to each genus provides a unique identifier to each OTU which is further used in Heatmaps as labels for the x and y axis, in Supplementary Figure 16, 17 and 18 to illustrate the correlations between the OTUs.

| <b>OTUs in Cirrhosis study</b> |               |                                                                                                                                                                                                                                                                                                                                                                                                                                                                                                                                                                                                                                                                                                                                                                                                                                                                                             |
|--------------------------------|---------------|---------------------------------------------------------------------------------------------------------------------------------------------------------------------------------------------------------------------------------------------------------------------------------------------------------------------------------------------------------------------------------------------------------------------------------------------------------------------------------------------------------------------------------------------------------------------------------------------------------------------------------------------------------------------------------------------------------------------------------------------------------------------------------------------------------------------------------------------------------------------------------------------|
| <b>Cluster</b>                 | <b>Phylum</b> | <b>Genus</b>                                                                                                                                                                                                                                                                                                                                                                                                                                                                                                                                                                                                                                                                                                                                                                                                                                                                                |
| Cluster 1                      | p_Firmicutes  | 1. g_Abiotrophia<br>2. g_Acidaminococcaceae_unclassified<br>3. g_Acidaminococcus<br>4. g_Aerococcus<br>5. g_Anaerococcus<br>6. g_Anaerofustis<br>7. g_Anaeroglobus<br>8. g_Anaerostipes<br>9. g_Anaerotruncus<br>10. g_Anoxybacillus<br>11. g_Bacillus<br>12. g_Blautia<br>13. g_Bulleidia<br>14. g_Butyricicoccus<br>15. g_Butyrivibrio<br>16. g_Catenibacterium<br>17. g_Catonella<br>18. g_Centipeda<br>19. g_Clostridiaceae_noname<br>20. g_Clostridiales_Family_XIII_Incertae_Sedis_noname<br>21. g_Clostridiales_Family_XIII_Incertae_Sedis_unclassified<br>22. g_Clostridiales_noname<br>23. g_Clostridium<br>24. g_Coprobacillus<br>25. g_Coprococcus<br>26. g_Dialister<br>27. g_Dorea<br>28. g_Eggerthia<br>29. g_Enterococcus<br>30. g_Erysipelotrichaceae_noname<br>31. g_Eubacterium<br>32. g_Faecalibacterium<br>33. g_Filifactor<br>34. g_Finegoldia<br>35. g_Flavonifractor |

|           |                  |                                                                                                                                                                                                                                                                                                                                                                                                                                                                                                                                                                                                                                                                                                                                                                                                                                                                                                                                                    |
|-----------|------------------|----------------------------------------------------------------------------------------------------------------------------------------------------------------------------------------------------------------------------------------------------------------------------------------------------------------------------------------------------------------------------------------------------------------------------------------------------------------------------------------------------------------------------------------------------------------------------------------------------------------------------------------------------------------------------------------------------------------------------------------------------------------------------------------------------------------------------------------------------------------------------------------------------------------------------------------------------|
|           |                  | <p>36. g_Gemella</p> <p>37. g_Granulicatella</p> <p>38. g_Holdemania</p> <p>39. g_Lachnoanaerobaculum</p> <p>40. g_Lachnospiraceae_noname</p> <p>41. g_Lactobacillus</p> <p>42. g_Lactococcus</p> <p>43. g_Leuconostoc</p> <p>44. g_Megamonas</p> <p>45. g_Megasphaera</p> <p>46. g_Mitsuokella</p> <p>47. g_Oribacterium</p> <p>48. g_Oscillibacter</p> <p>49. g_Parvimonas</p> <p>50. g_Pediococcus</p> <p>51. g_Peptoniphilus</p> <p>52. g_Peptostreptococcaceae_noname</p> <p>53. g_Peptostreptococcus</p> <p>54. g_Phascolarctobacterium</p> <p>55. g_Pseudoflavonifractor</p> <p>56. g_Roseburia</p> <p>57. g_Ruminococcaceae_noname</p> <p>58. g_Ruminococcus</p> <p>59. g_Selenomonas</p> <p>60. g_Shuttleworthia</p> <p>61. g_Solobacterium</p> <p>62. g_Staphylococcus</p> <p>63. g_Stomatobaculum</p> <p>64. g_Streptococcus</p> <p>65. g_Subdoligranulum</p> <p>66. g_Turicibacter</p> <p>67. g_Veillonella</p> <p>68. g_Weissella</p> |
| Cluster 2 | p_Proteobacteria | <p>69. g_Acinetobacter</p> <p>70. g_Actinobacillus</p> <p>71. g_Aeromonas</p> <p>72. g_Aggregatibacter</p> <p>73. g_Bartonella</p> <p>74. g_Bilophila</p> <p>75. g_Bordetella</p> <p>76. g_Burkholderia</p> <p>77. g_Burkholderiales_noname</p>                                                                                                                                                                                                                                                                                                                                                                                                                                                                                                                                                                                                                                                                                                    |

78. g\_Campylobacter
79. g\_Cardiobacteriaceae\_unclassified
80. g\_Cardiobacterium
81. g\_Chromobacterium
82. g\_Citrobacter
83. g\_Comamonas
84. g\_Cronobacter
85. g\_Desulfovibrio
86. g\_Eikenella
87. g\_Enterobacter
88. g\_Enterobacteriaceae\_noname
89. g\_Escherichia
90. g\_Gallionellaceae\_unclassified
91. g\_Haemophilus
92. g\_Halomonas
93. g\_Helicobacter
94. g\_Kingella
95. g\_Klebsiella
96. g\_Kosakonia
97. g\_Lautropia
98. g\_Morganella
99. g\_Neisseria
100. g\_Oxalobacter
101. g\_Pantoea
102. g\_Parasutterella
103. g\_Pectobacterium
104. g\_Plesiomonas
105. g\_Proteus
106. g\_Providencia
107. g\_Pseudomonas
108. g\_Pusillimonas
109. g\_Ralstonia
110. g\_Raoultella
111. g\_Rhodopseudomonas
112. g\_Rhodospirillum
113. g\_Serratia
114. g\_Shewanella
115. g\_Shigella
116. g\_Sinobacteraceae\_unclassified
117. g\_Succinatimonas
118. g\_Sutterella
119. g\_Sutterellaceae\_unclassified



|           |                                                                                                                                                                                                                                                   |                                                                                                                                                                                                                                                                                                                                                                                                                                                                                                                                                                                                                                    |
|-----------|---------------------------------------------------------------------------------------------------------------------------------------------------------------------------------------------------------------------------------------------------|------------------------------------------------------------------------------------------------------------------------------------------------------------------------------------------------------------------------------------------------------------------------------------------------------------------------------------------------------------------------------------------------------------------------------------------------------------------------------------------------------------------------------------------------------------------------------------------------------------------------------------|
|           |                                                                                                                                                                                                                                                   | 120. g_Yersinia                                                                                                                                                                                                                                                                                                                                                                                                                                                                                                                                                                                                                    |
| Cluster 3 | p_Actinobacteria                                                                                                                                                                                                                                  | 121. g_Actinomyces<br>122. g_Actinopolyspora<br>123. g_Adlercreutzia<br>124. g_Alloscardovia<br>125. g_Atopobium<br>126. g_Bifidobacterium<br>127. g_Brevibacterium<br>128. g_Collinsella<br>129. g_Coriobacteriaceae_noname<br>130. g_Corynebacterium<br>131. g_Cryptobacterium<br>132. g_Eggerthella<br>133. g_Gardnerella<br>134. g_Gordonibacter<br>135. g_Kocuria<br>136. g_Olsenella<br>137. g_Parascardovia<br>138. g_Propionibacteriaceae_unclassified<br>139. g_Propionibacterium<br>140. g_Pseudonocardia<br>141. g_Rothia<br>142. g_Saccharomonospora<br>143. g_Saccharopolyspora<br>144. g_Scardovia<br>145. g_Slackia |
| Cluster 4 | 1. p_Spirochaetes<br>2. p_Synergistetes<br>3. p_Tenericutes<br>4.<br>p_Verrucomicrobia<br>5. p_Bacteroidetes<br>6. p_Candidatus<br>_Saccharibacteria<br>7. p_Chlorobi<br>8. p_Deinococcus<br>_Thermus<br>9. p_Acidobacteria<br>10. p_Fusobacteria | 146. g_Brachyspira<br>147. g_Fretibacterium<br>148. g_Pyramidobacter<br>149. g_Synergistes<br><br>150. g_Akkermansia<br>151. g_Naumovozyma<br><br>152. g_Saccharomyces<br>153. g_Saccharomycetaceae_unclassified<br><br>154. g_Alistipes<br>155. g_Alloprevotella<br>156. g_Bacteroidales_noname<br>157. g_Bacteroides<br>158. g_Bacteroidetes_noname                                                                                                                                                                                                                                                                              |

159. g\_Barnesiella
160. g\_Butyricimonas
161. g\_Cellulophaga
162. g\_Coprobacter
163. g\_Dysgonomonas
164. g\_Odoribacter
165. g\_Parabacteroides
166. g\_Paraprevotella
167. g\_Pedobacter
168. g\_Porphyrimonas
169. g\_Prevotella
170. g\_Riemerella
171. g\_Sphingobacterium
172. g\_Zunongwangia
173. g\_Candidatus\_Saccharibacteria\_noname
174. g\_Candidatus\_Saccharibacteria\_noname\_unclassified
175. g\_Chlorobium
176. g\_Deinococcus
177. g\_Meiothermus
178. g\_Methanocaldococcaceae\_unclassified
179. g\_Acidobacteriaceae\_unclassified
180. g\_Granulicella
181. g\_Cetobacterium
182. g\_Fusobacterium
183. g\_Leptotrichia
184. g\_Leptotrichiaceae\_unclassified

Supplementary Table 4: Association of age and sex to outcome of disease status in the T2D and Cirrhosis studies.

| <b>Variables</b>              | <b>T2D</b>     |                 |                | <b>Cirrhosis</b> |                 |                |
|-------------------------------|----------------|-----------------|----------------|------------------|-----------------|----------------|
|                               | <b>Cases</b>   | <b>Controls</b> | <b>p-value</b> | <b>Cases</b>     | <b>Controls</b> | <b>p-value</b> |
| Age Mean (standard deviation) | 54.5<br>(13.7) | 41.6<br>(12.7)  | <0.001         | 49.9<br>(11.3)   | 42.5 (9.3)      | <0.001         |
| Male (Frequency (%))          | 106<br>(62.4%) | 84<br>(48.3%)   | 0.009          | 80<br>(67.8%)    | 72<br>(63.2%)   | 0.457          |
| Female (Frequency (%))        | 64<br>(37.6%)  | 90<br>(51.7%)   |                | 38<br>(32.2%)    | 42<br>(36.8%)   |                |

## 1.0.2 Analysing effect of interaction terms

We have considered 3 interaction terms while simulating our OTU data to approximate the possible OTU interactions that may be present in the the real studies. These interaction terms introduce non-linearity in the OTU data and disease outcome. To analyse whether, *taxoNN* is efficiently capturing this non-linearity, we compared the performance of *taxoNN* with other machine learning methods with and without the 3 interaction terms during the simulations (Supplementary Table 5). We observed that if we removed the interaction terms, the AUC obtained through *taxoNN<sub>corr</sub>* on the test set was observed to be 0.891 whereas, *taxoNN<sub>dis</sub>* gave an AUC value of 0.884. However, it was interesting to note that, eliminating the non-linearity in the data improved the performance of other methods as well. RF gave an AUC value of 0.865, SVM's AUC was 0.844, Ridge regression's AUC was 0.841, Lasso regression gave an AUC of 0.838, GBC gave an AUC value of 0.827, NB's AUC value improved to 0.815 and CNN\_shuffle and CNN\_basic gave AUC values of 0.844 and 0.812 respectively. On the other hand, the results of the performance of each method with interaction terms is shown in Figure 4. We observed that there was a significant improvement in AUC values of *taxoNN<sub>corr</sub>* and other machine learning methods, ranging from difference in AUC from 0.037 to 0.13 when we introduced non-linearity in the simulation study.

Supplementary Table 5: AUC values tabulated for various machine learning methods on test set of simulation studies. The results are reported on considering model performance without (w/o) interactions and with interactions. Note that the last row shows the consistent improvement in the performance of the proposed model *taxoNN<sub>corr</sub>* for both scenarios.

| Method                       | AUC w/o interaction | AUC with interaction |
|------------------------------|---------------------|----------------------|
| Random Forest                | 0.865               | 0.846                |
| Gaussian Bayes Classifier    | 0.827               | 0.792                |
| Support Vector Machines      | 0.844               | 0.825                |
| Lasso Regression             | 0.838               | 0.799                |
| Ridge Regression             | 0.841               | 0.823                |
| Naive Bayes                  | 0.815               | 0.790                |
| CNN_basic                    | 0.844               | 0.753                |
| CNN_shuffle                  | 0.812               | 0.822                |
| <i>taxoNN<sub>dis</sub></i>  | 0.884               | 0.874                |
| <i>taxoNN<sub>corr</sub></i> | <b>0.891</b>        | <b>0.883</b>         |

Supplementary Table 6: Mean AUC values tabulated for various machine learning methods on training set of T2D and Cirrhosis studies. The results are reported on considering 10 times 10-fold cross-validation on both studies. Note that the last row shows the consistent improvement in the performance of the proposed model  $taxoNN_{corr}$  for both studies.

| <b>Method</b>             | <b>AUC for T2D</b> | <b>AUC for Cirrhosis</b> |
|---------------------------|--------------------|--------------------------|
| Random Forest             | 0.740              | 0.892                    |
| Gaussian Bayes Classifier | 0.684              | 0.874                    |
| Support Vector Machines   | 0.721              | 0.881                    |
| Lasso Regression          | 0.687              | 0.862                    |
| Ridge Regression          | 0.699              | 0.877                    |
| Naive Bayes               | 0.682              | 0.870                    |
| CNN_basic                 | 0.667              | 0.832                    |
| CNN_shuffle               | 0.736              | 0.895                    |
| $taxoNN_{dis}$            | 0.741              | 0.919                    |
| $taxoNN_{corr}$           | <b>0.753</b>       | <b>0.921</b>             |

### 1.0.3 Validation on external cohort

We used the Type 2 Diabetes study evaluated by Karlsson et al. in their 2013 Nature Paper [5], which comprises of metformin confounding information along with OTU data (We call it T2D II).

Supplementary Table 7: Association of age and metformin to outcome of disease status in the T2D II study

| Variables                                          | T2D II study (53 cases and 43 controls) |                |         |
|----------------------------------------------------|-----------------------------------------|----------------|---------|
|                                                    | Cases                                   | Controls       | p-value |
| Age Mean (standard deviation)                      | 70.4<br>(0.78)                          | 70.3<br>(0.69) | 0.286   |
| Number of individuals with metformin intake (In %) | 20<br>(37.7%)                           | 0 (0%)         | <0.001  |
| Male (Frequency (%))                               | 0 (0%)                                  | 0 (0%)         |         |
| Female (Frequency (%))                             | 53 (100%)                               | 43 (100%)      |         |

This study had 53 cases and 43 controls, all of which were females. In the cases, 20 individuals had taken metformin medication, while none of the controls had taken metformin. A table describing the T2D II cohort in terms of age, metformin medication intake and number of samples is shown in the presented in the supplementary file, Supplementary Table 7.

We carried additional experiments on this dataset:

- 1<sup>st</sup> Experiment: To externally validate our results as an independent cohort, we divided the new T2D study (T2D II) into 4 major clusters based on the phyla containing majority OTUs, in a similar fashion, as we had done for T2D study in our manuscript. We applied *taxoNN* trained on T2D dataset [1] mentioned originally in our manuscript, to T2D II. We obtained robust results on comparing *taxoNN* to other methods on this new validation set, shown in the first column of Supplementary Table 8.
- 2<sup>nd</sup> Experiment: To understand the effect of metformin in the T2D II study we stratified the OTUs based on the phylum level into 4 clusters. After putting the OTU data into 4 clusters for all subjects, we provided metformin information in a column along with the relative abundance of OTUs in each of the clusters and trained the model. This was done in a similar manner as we had included age and sex as covariates along with OTU data in the original manuscript for T2D dataset. The AUC value obtained using metformin as covariate in the *taxoNN<sub>corr</sub>* model provided consistently better performance, in comparison to other

conventional machine learning models as shown in the second column of Supplementary Table 8.

Supplementary Table 8: AUC values tabulated for various machine learning methods on T2D II study. The results are reported considering model performance using only OTU data and with metformin information as a covariate alongwith OTU data. Note that the last row (values in bold) shows the consistent improvement in the performance of the proposed model  $taxoNN_{corr}$  for both cases.

| Method                    | AUC on T2D II study |                                   |
|---------------------------|---------------------|-----------------------------------|
|                           | OTU data            | OTU data with metformin covariate |
| Random Forest             | 0.702               | 0.696                             |
| Gaussian Bayes Classifier | 0.611               | 0.602                             |
| Support Vector Machines   | 0.641               | 0.655                             |
| Lasso Regression          | 0.667               | 0.658                             |
| Ridge Regression          | 0.689               | 0.688                             |
| Naive Bayes               | 0.662               | 0.667                             |
| CNN_basic                 | 0.602               | 0.598                             |
| CNN_shuffle               | 0.658               | 0.649                             |
| $taxoNN_{dis}$            | 0.693               | 0.701                             |
| $taxoNN_{corr}$           | <b>0.709</b>        | <b>0.711</b>                      |

These two experiments show that our method is stable and gives good performance on an external validation set, as well as, is robust when metformin is chosen as a covariate.

#### 1.0.4 Stratification based on class level in the taxonomy tree

Choosing phylum level for our clustering was a strategic choice because we wanted to have adequate number of OTUs per cluster. This was done to ensure proper training of our model after stratification, and at the same time be able to find an association between the OTUs to arrange them for giving them as an input to the CNN.

As we divided the clusters based on phyla with majority OTUs, we were able to determine 4 main clusters, each containing adequate number of OTUs for training our network. But when we went a level down in the taxonomy tree, to class level we noticed that there were fewer OTUs in each class.

Supplementary Table 9: AUC values tabulated for various machine learning methods upon class based stratification for T2D and Cirrhosis studies.

| <b>Method</b>                | <b>AUC T2D</b> | <b>AUC Cirrhosis</b> |
|------------------------------|----------------|----------------------|
| Random Forest                | 0.703          | 0.893                |
| Gaussian Bayes Classifier    | 0.642          | 0.816                |
| Support Vector Machines      | 0.701          | 0.877                |
| Lasso Regression             | 0.665          | 0.823                |
| Ridge Regression             | 0.700          | 0.842                |
| Naive Bayes                  | 0.682          | 0.802                |
| <i>taxoNN<sub>dis</sub></i>  | 0.700          | 0.887                |
| <i>taxoNN<sub>corr</sub></i> | 0.706          | 0.892                |

For example, in Cirrhosis dataset, we had 3 major phyla, namely, p\_Actinobacteria with 38 OTUs, p\_Firmicutes with 91 OTUs and p\_Proteobacteria with 91 OTUs. Going down the taxonomy tree we had 40 different classes in class level and 60 different orders in order level. In such a case, in stratification based on classes, we could identify 5 major classes which had number of OTUs that were more than 20. Class c\_Actinobacteria contained 38 OTUs, c\_Bacilli contained 27 OTUs, c\_Betaproteobacteria contained 25 OTUs, c\_Clostridia contained 44 OTUs, c\_Gammaproteobacteria contained 44 OTUs and the rest of the classes were clubbed in another cluster. The performance of each method on this approach for both studies is given in Table 9. We observed a drop in our model performance by stratifying in terms of classes, which we attribute to the fact that there were not enough OTUs in each cluster for the algorithm to learn well.



## 2 Supplementary Figures

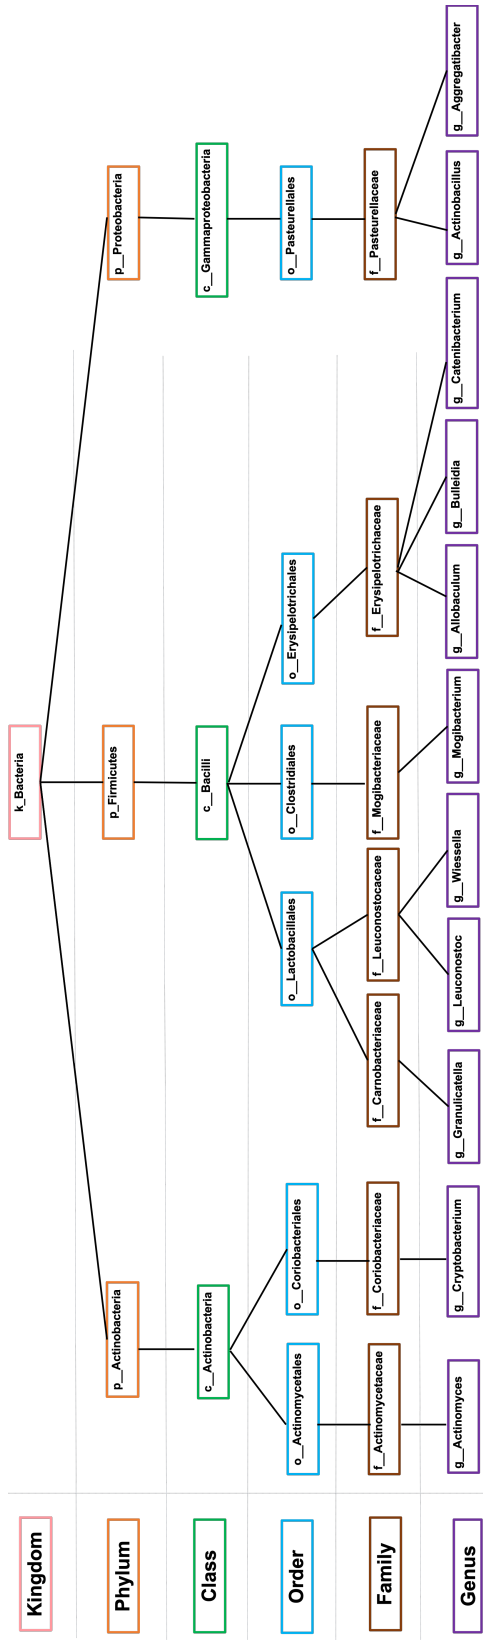

Supplementary Figure 1: Example of taxonomy levels in the OTU data illustrated using 29 OTUs taken from the OTU data publicly available in [3]

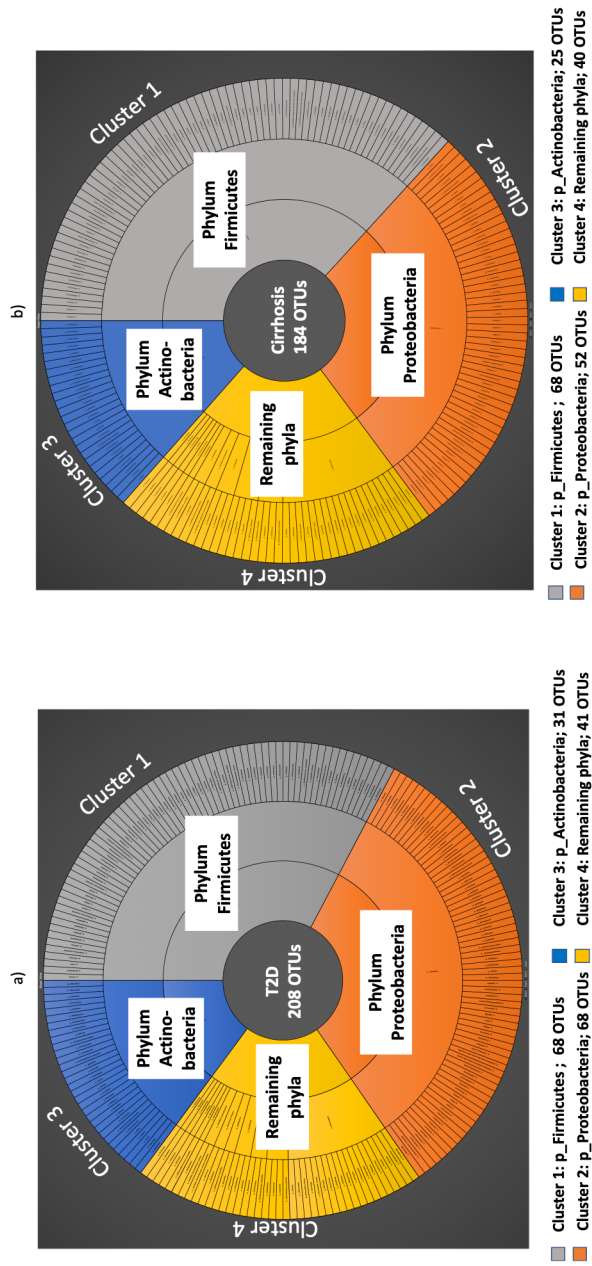

Supplementary Figure 2: OTU clustering in a) T2D study (208 OTUs) b) Cirrhosis study (184 OTUs). Outer circle represents the OTUs at the genus level for each cluster. Note that in both studies Proteobacteria, Actinobacteria and Firmicutes played as the phyla with highest number of OTUs in a single phylum, leading to forming the three major clusters for *taxoNN*.

## Relative abundance percentage of phyla in the T2D dataset

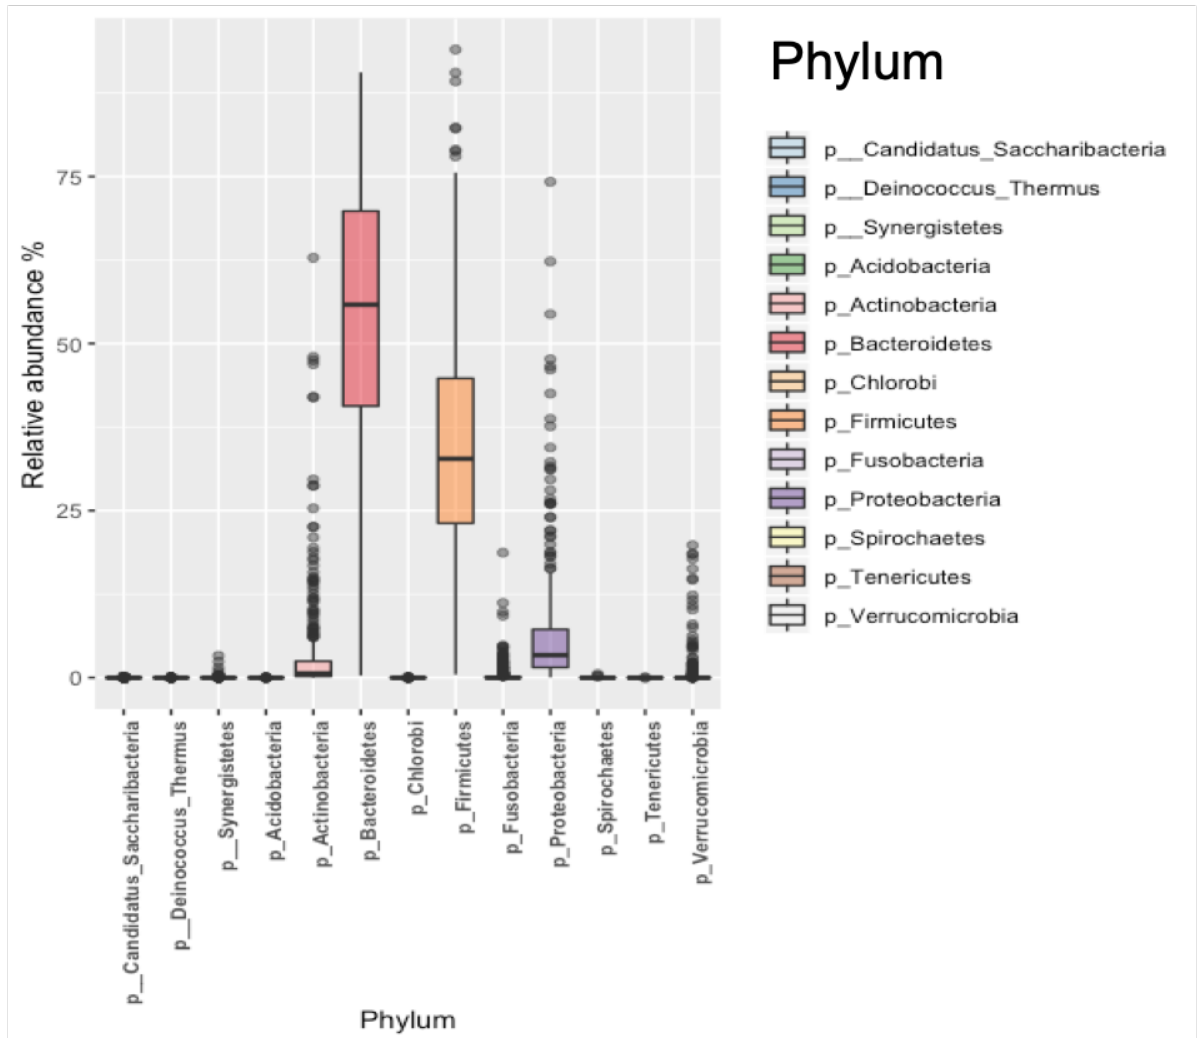

Supplementary Figure 3: Boxplot illustrating relative abundance percentage of OTUs in each phylum of the T2D study. The upper whisker extends from the hinge to the largest value no further than  $1.5 * IQR$  from the hinge (where  $IQR$  is the inter-quartile range, or distance between the first and third quartiles). The lower whisker extends from the hinge to the smallest value at most  $1.5 * IQR$  of the hinge. Data beyond the end of the whiskers are called "outlying" points and are plotted individually.

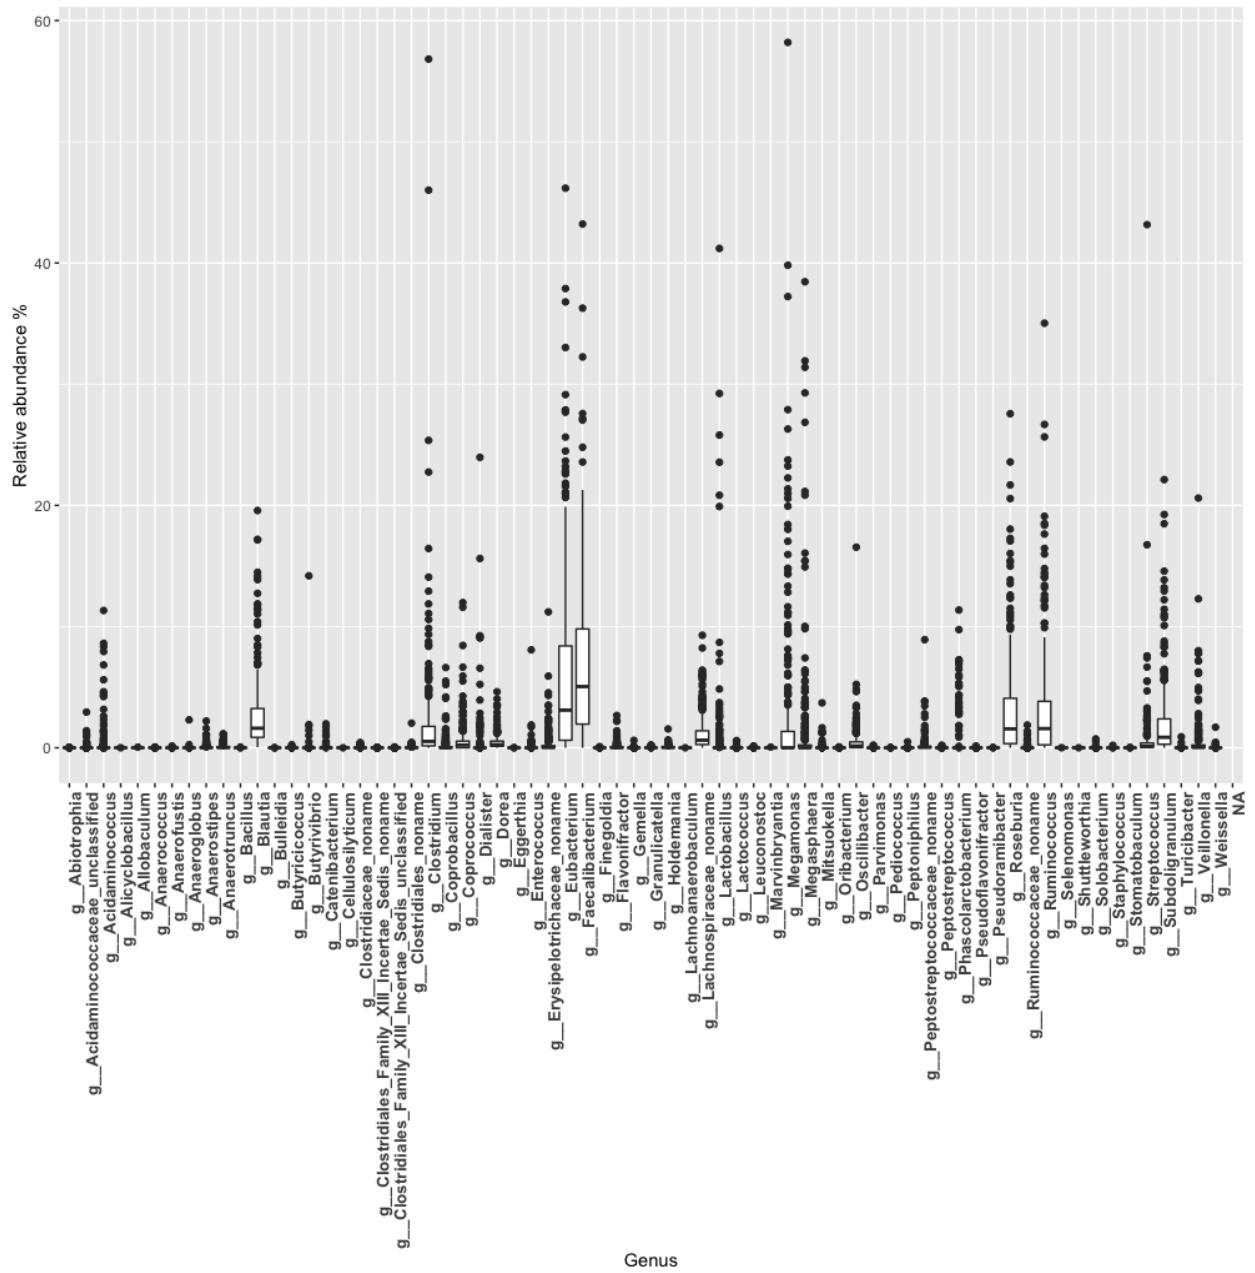

Supplementary Figure 4: Relative abundance percentage of OTUs at genus level in the Firmicutes phylum of the T2D study

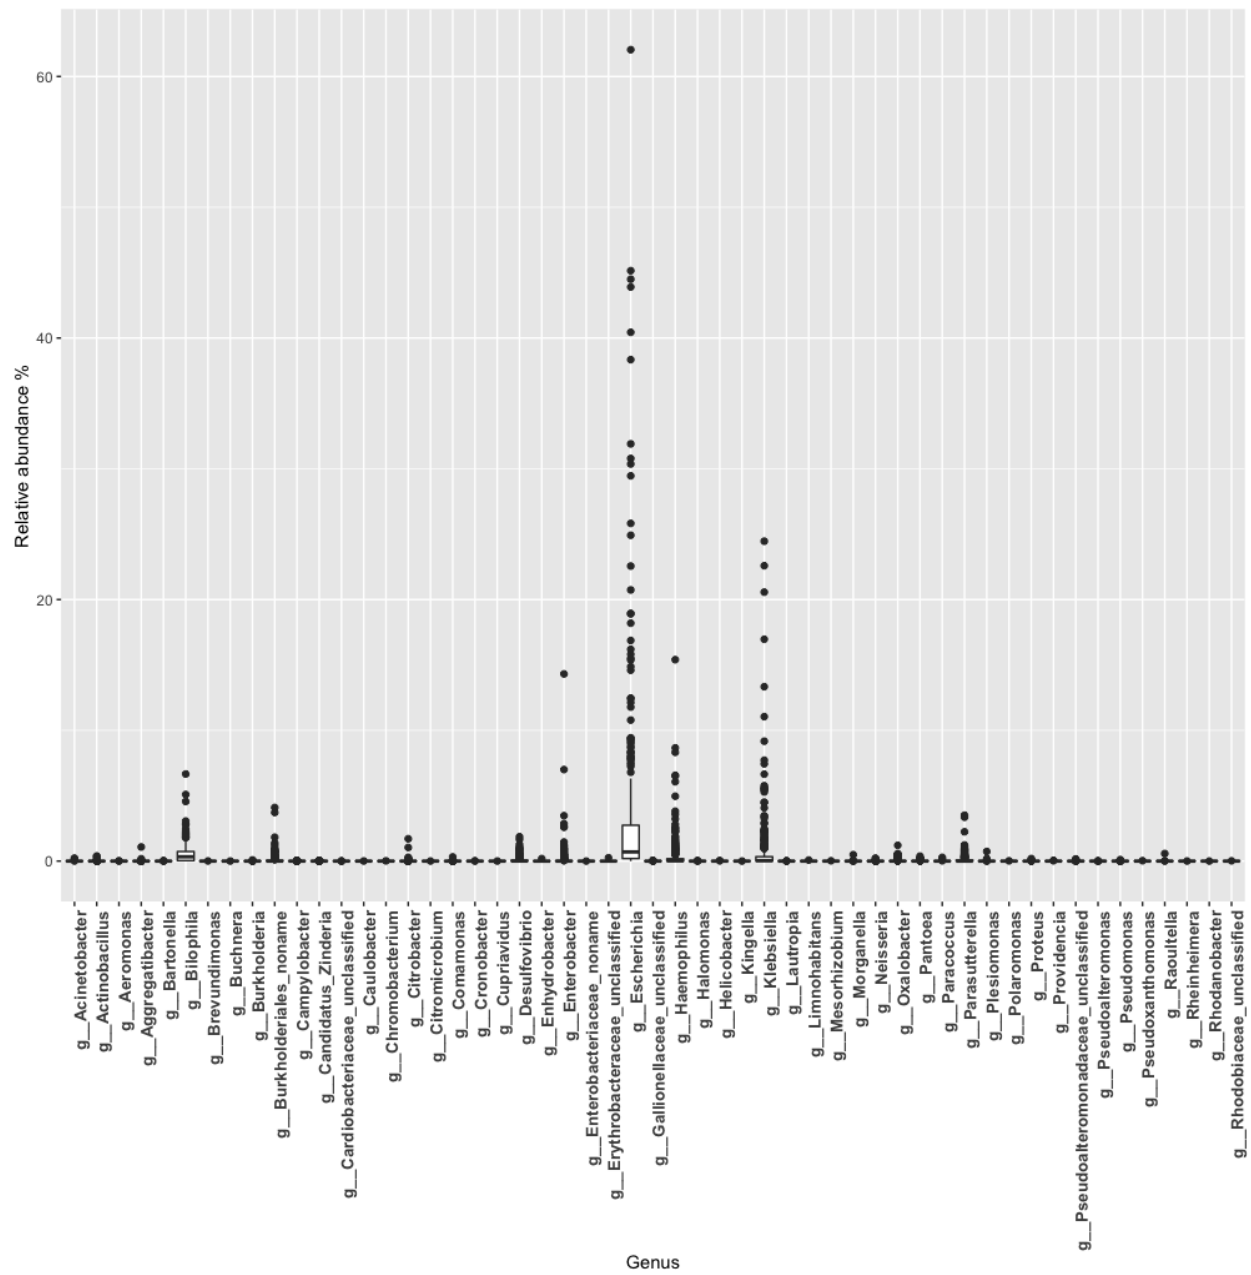

Supplementary Figure 5: Relative abundance percentage of OTUs at genus level in the Proteobacteria phylum of the T2D study

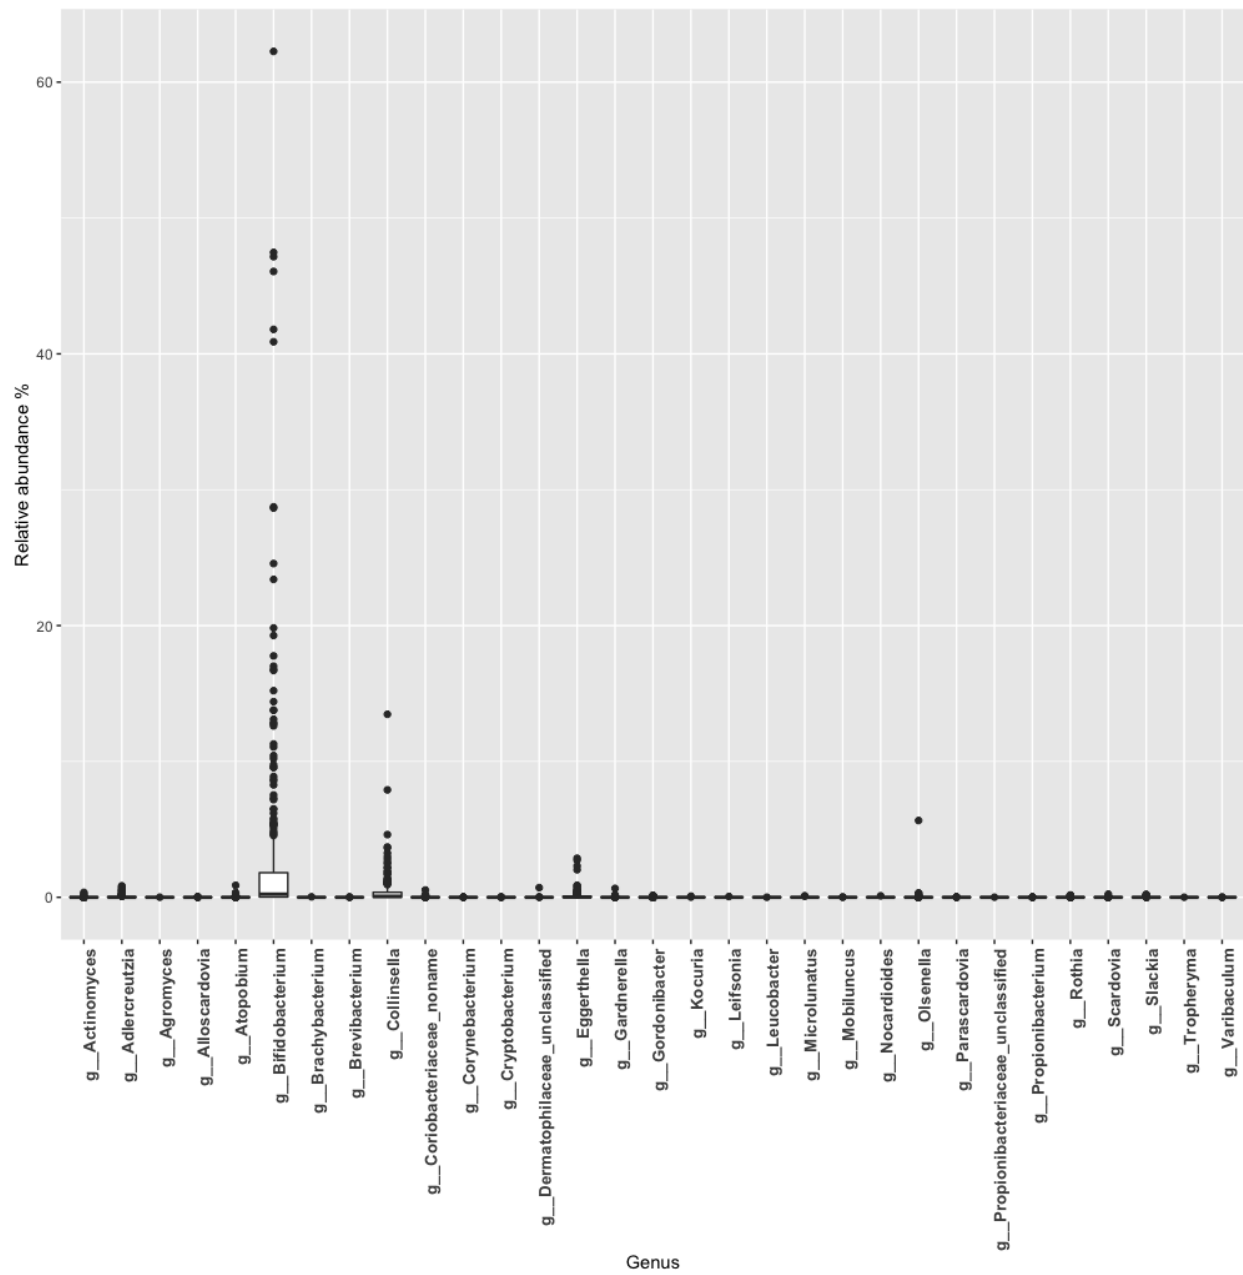

Supplementary Figure 6: Relative abundance percentage of OTUs at genus level in the Actinobacteria phylum of the T2D study

## Relative abundance percentage of phyla in the Cirrhosis dataset

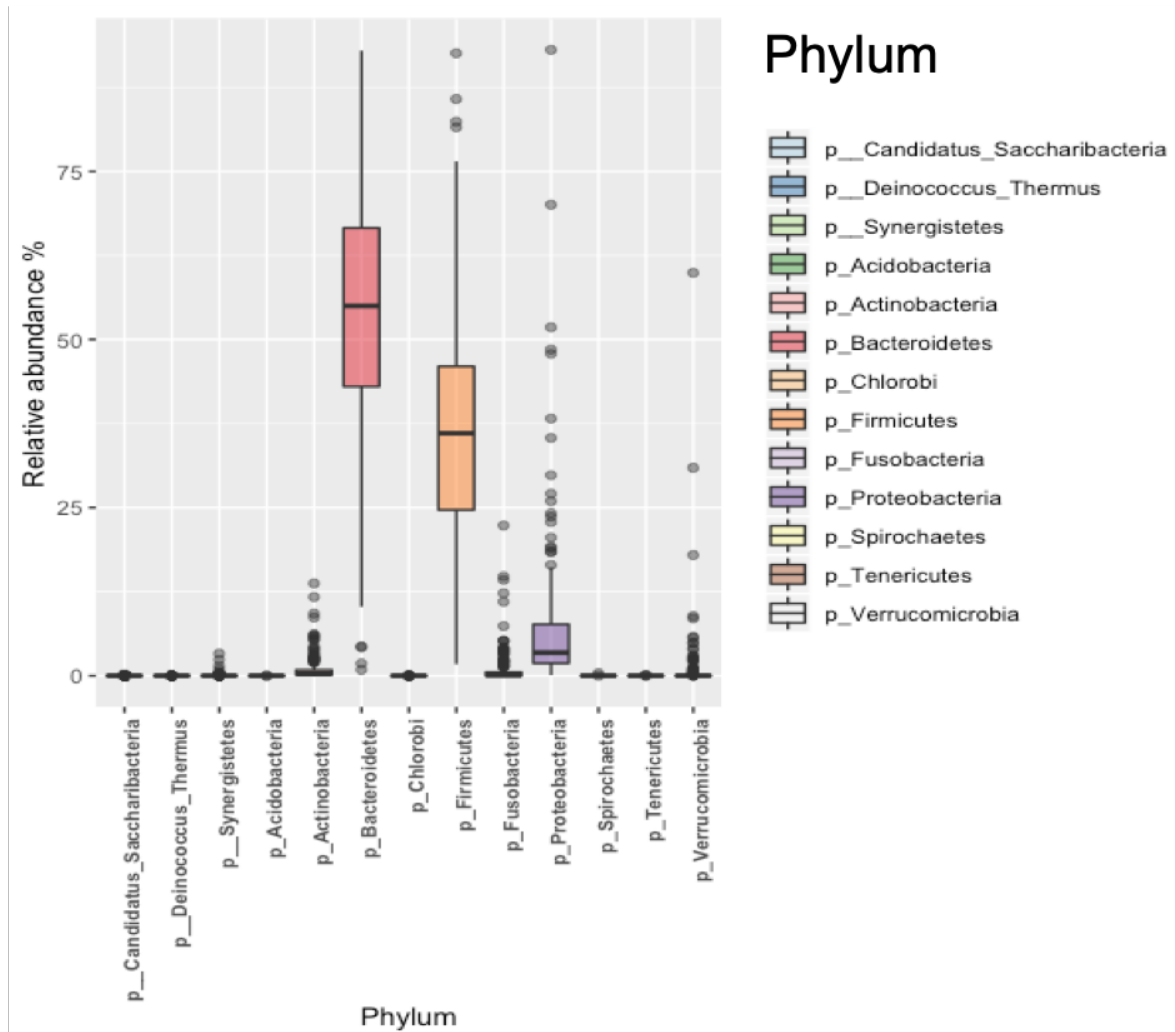

Supplementary Figure 7: Boxplot illustrating relative abundance percentage of OTUs in each phylum of the Cirrhosis study. The upper whisker extends from the hinge to the largest value no further than  $1.5 * IQR$  from the hinge (where IQR is the inter-quartile range, or distance between the first and third quartiles). The lower whisker extends from the hinge to the smallest value at most  $1.5 * IQR$  of the hinge. Data beyond the end of the whiskers are called "outlying" points and are plotted individually.



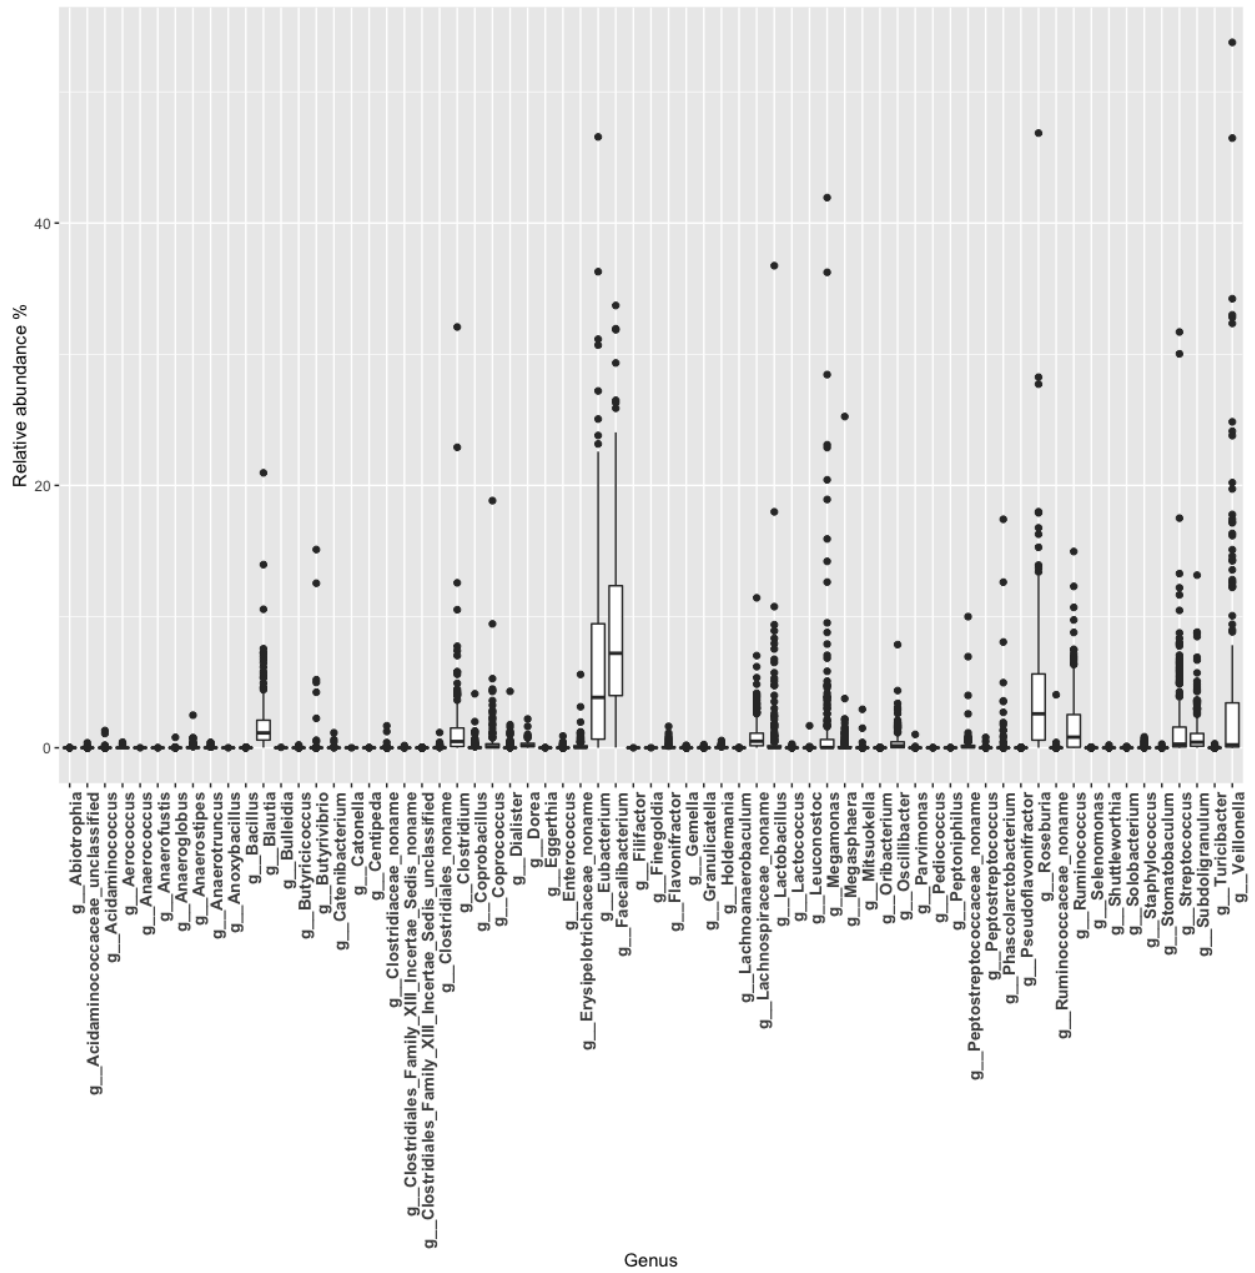

Supplementary Figure 8: Relative abundance percentage of OTUs at genus level in the Firmicutes phylum of the Cirrhosis study

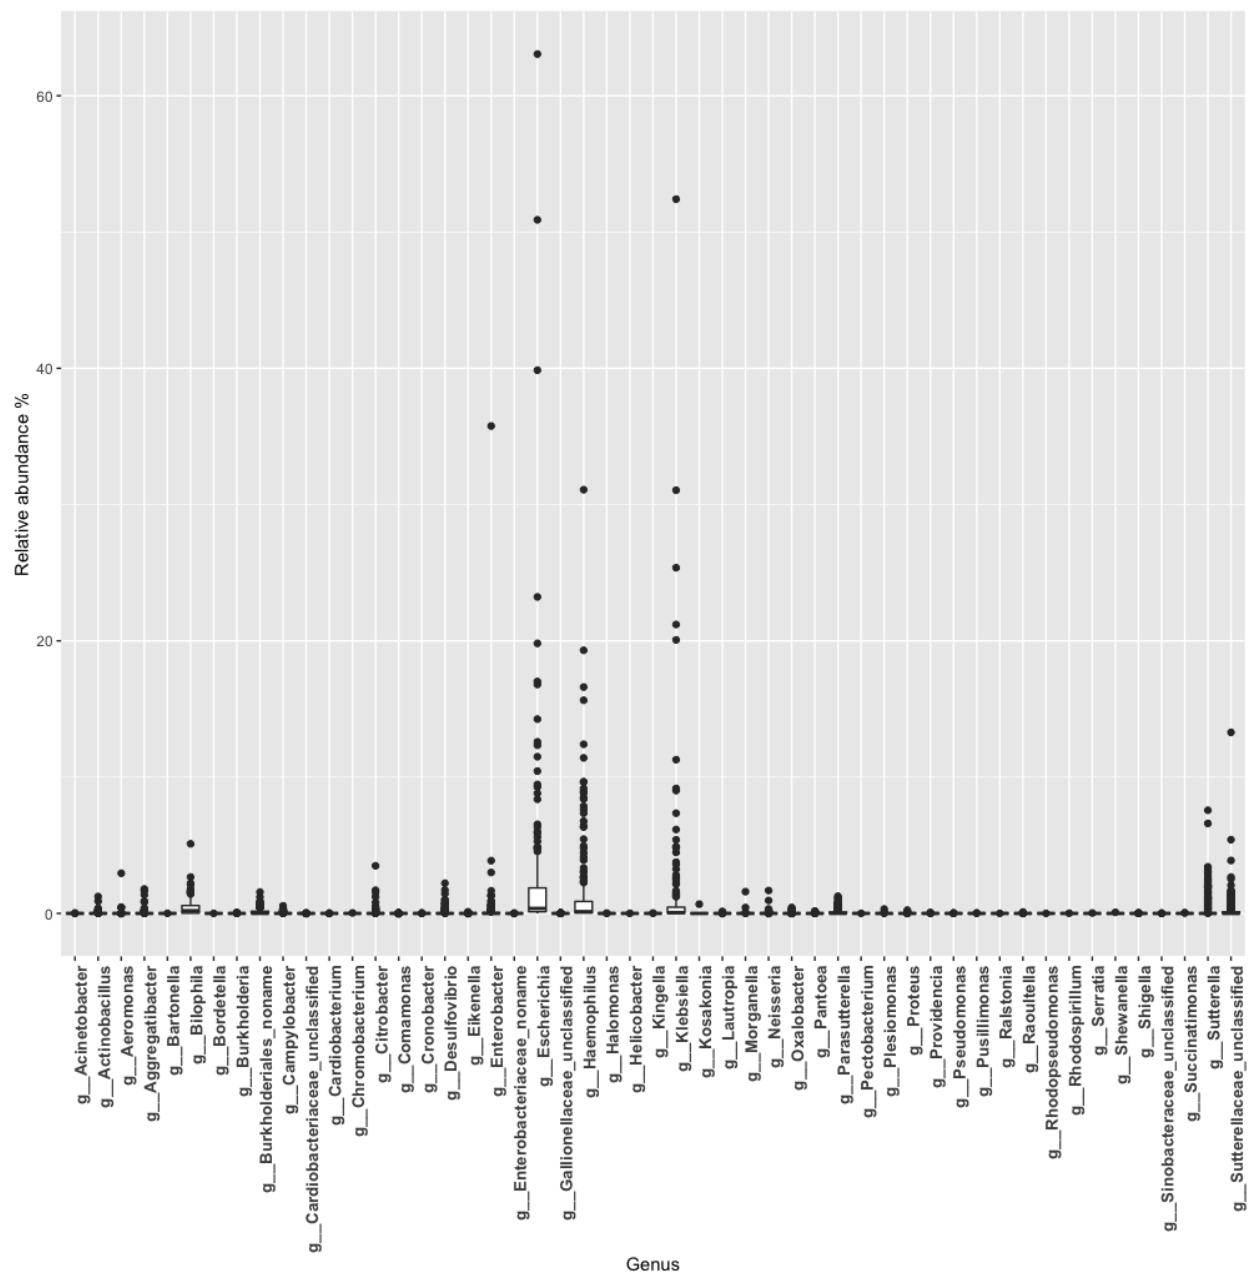

Supplementary Figure 9: Relative abundance percentage of OTUs at genus level in the Proteobacteria phylum of the Cirrhosis study

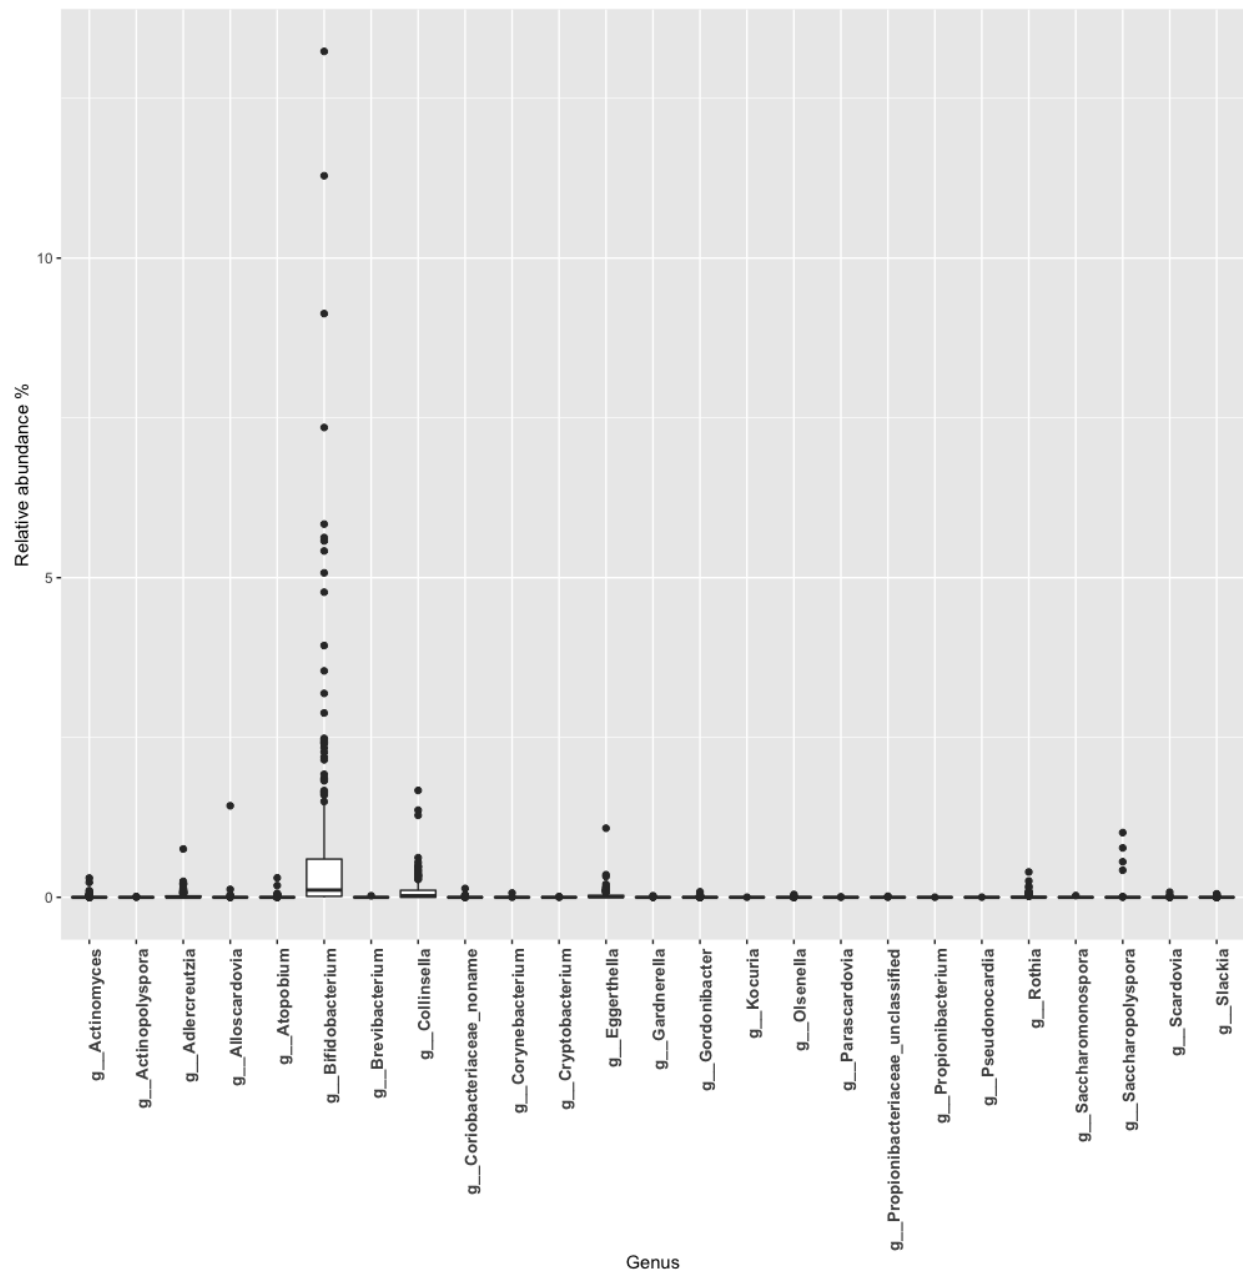

Supplementary Figure 10: Relative abundance percentage of OTUs at genus level in the Actinobacteria phylum of the Cirrhosis study

## 2.0.1 Robustness in imbalance of case and controls

To provide a comprehensive analysis, we also examined how robust *taxoNN* was in the scenario of imbalance of controls and cases in the input data. As can be seen in Supplementary Figure 11(a) with 200 cases and 200 controls, both the variations of the proposed model *taxoNN<sub>corr</sub>* and *taxoNN<sub>dis</sub>* perform well with a mean AUC of 0.877 and 0.858 respectively. In the case of 1:2 ratio (Supplementary Figure 11(b)) and 1:3 ratio (Supplementary Figure 11(c)) of cases and controls, *taxoNN<sub>corr</sub>*, seemed to perform better than other machine learning models with AUC equal to 0.857 and 0.827 respectively. However, as we increased the number of controls to 800 (Supplementary Figure 11(d)), we saw that the performance of other methods became comparable to our technique with the difference in AUC values between *taxoNN<sub>corr</sub>* and RF method reducing to 0.007.

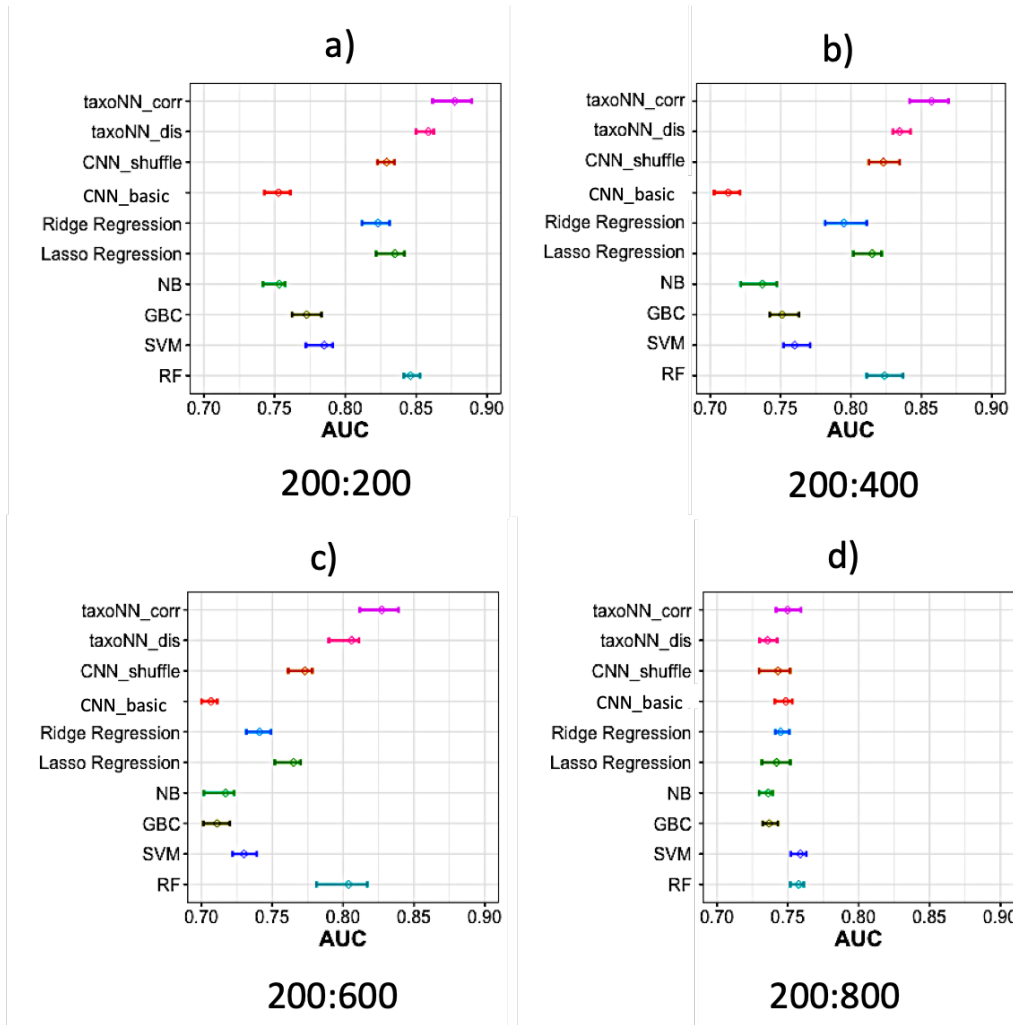

Supplementary Figure 11: Analysing performance of model in the scenario of case and control imbalance in the simulated data. a) Case and control data is properly balanced with 200 cases and controls each. b) Case and control ratio increasing to 1:2 c) 200 cases to 600 controls d) 1:4 ratio between case and control samples

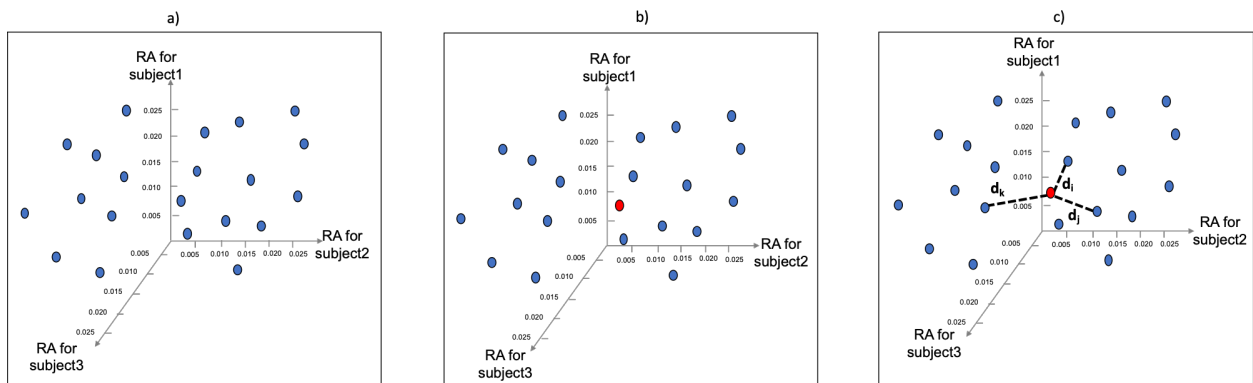

Supplementary Figure 12: An example plot to illustrate Euclidean distance based ordering in the OTUs in a cluster. (a) relative abundance of 21 OTUs for 3 subjects represented as blue dots. (b) red dot represents the medoid of the cluster. (c) black dashed lines represent the Euclidean distance of three OTUs from the medoid. As  $d_i$  is the smallest followed by  $d_j$  and  $d_k$ , therefore, OTU with distance  $d_i$  will be ordered first in the cluster as compared to OTU with distance  $d_j$ , followed by OTU with distance  $d_k$ . For the ease of understanding, this illustration is an example for only 3 subjects. However, in reality, there are multiple individuals (sample size = I) in a study leading to this 3-D plot being extended into an I-Dimensional space.

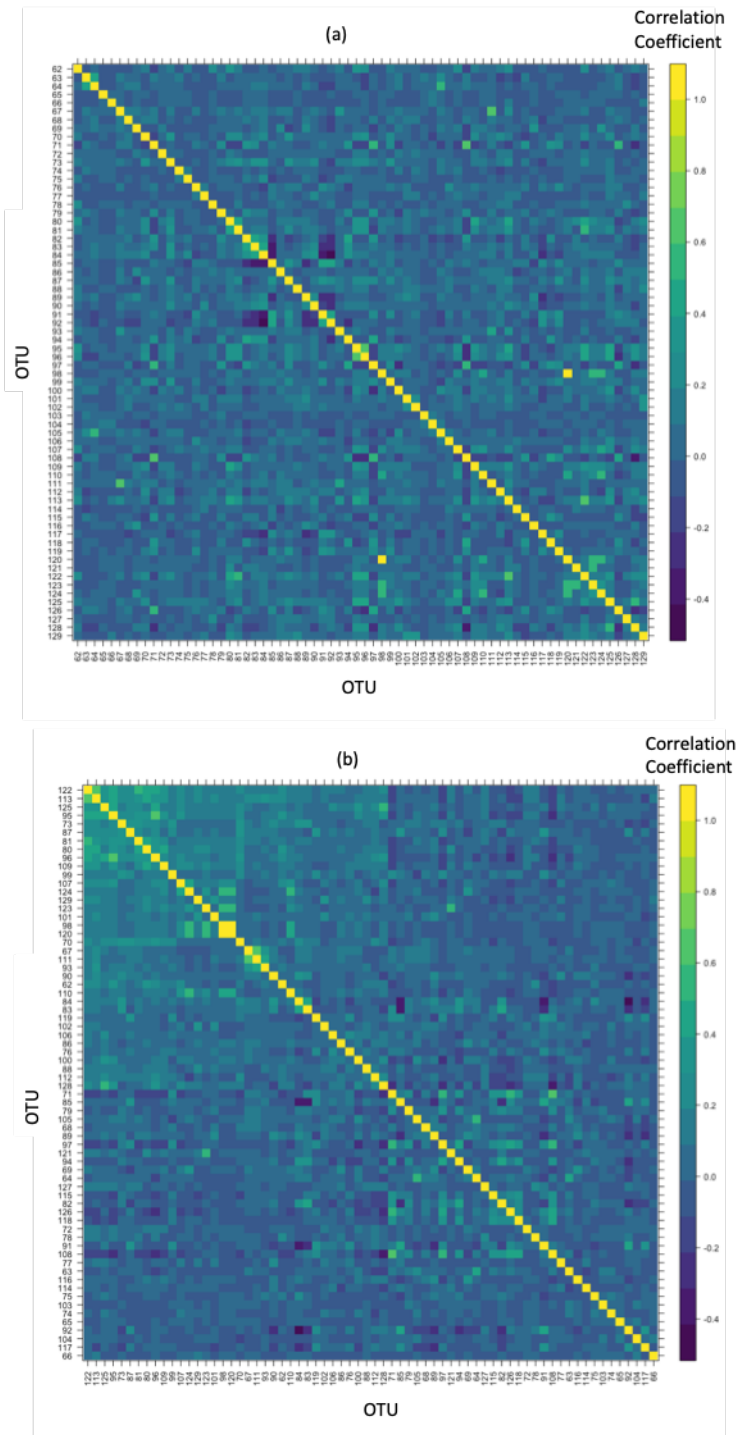

Supplementary Figure 13: Heatmaps for the Spearman rank of the OTUs in the cluster, Phylum Firmicutes, (a) before ordering and (b) after the ordering based on correlation of the OTUs in the T2D study

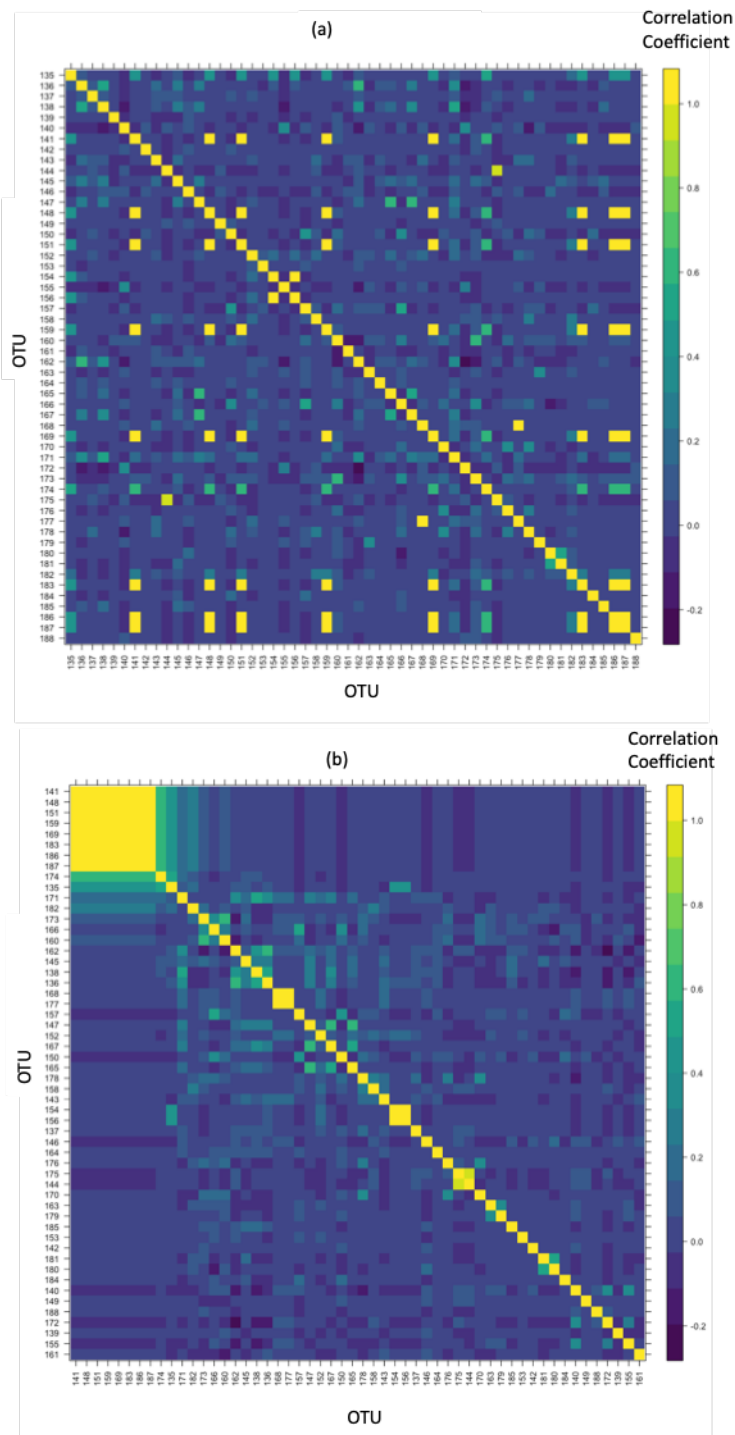

Supplementary Figure 14: Heatmaps for the Spearman rank of the OTUs in the cluster, Phylum Proteobacteria, (a) before ordering and (b) after the ordering based on correlation of the OTUs in the T2D study



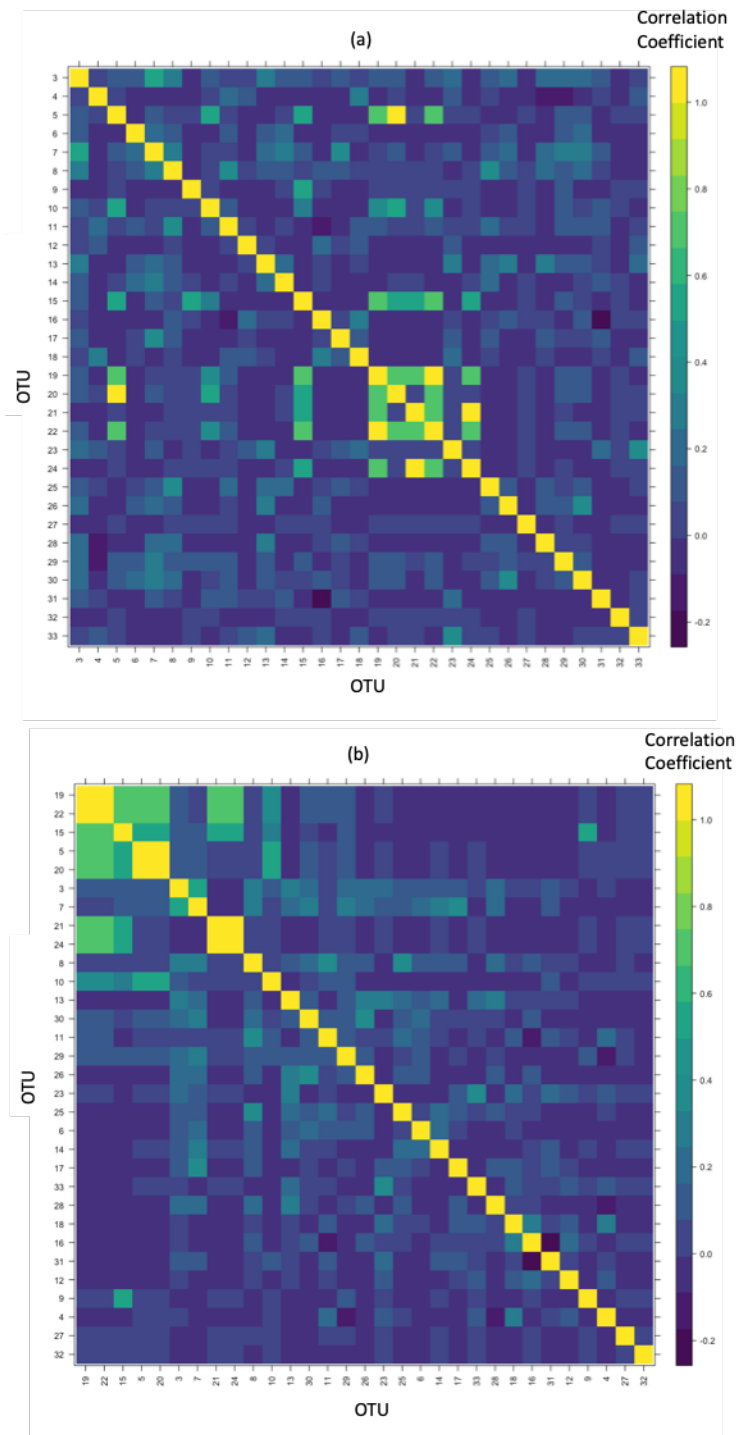

Supplementary Figure 15: Heatmaps for the Spearman rank of the OTUs in the cluster, Phylum Actinobacteria, (a) before ordering and (b) after the ordering based on correlation of the OTUs in the T2D study

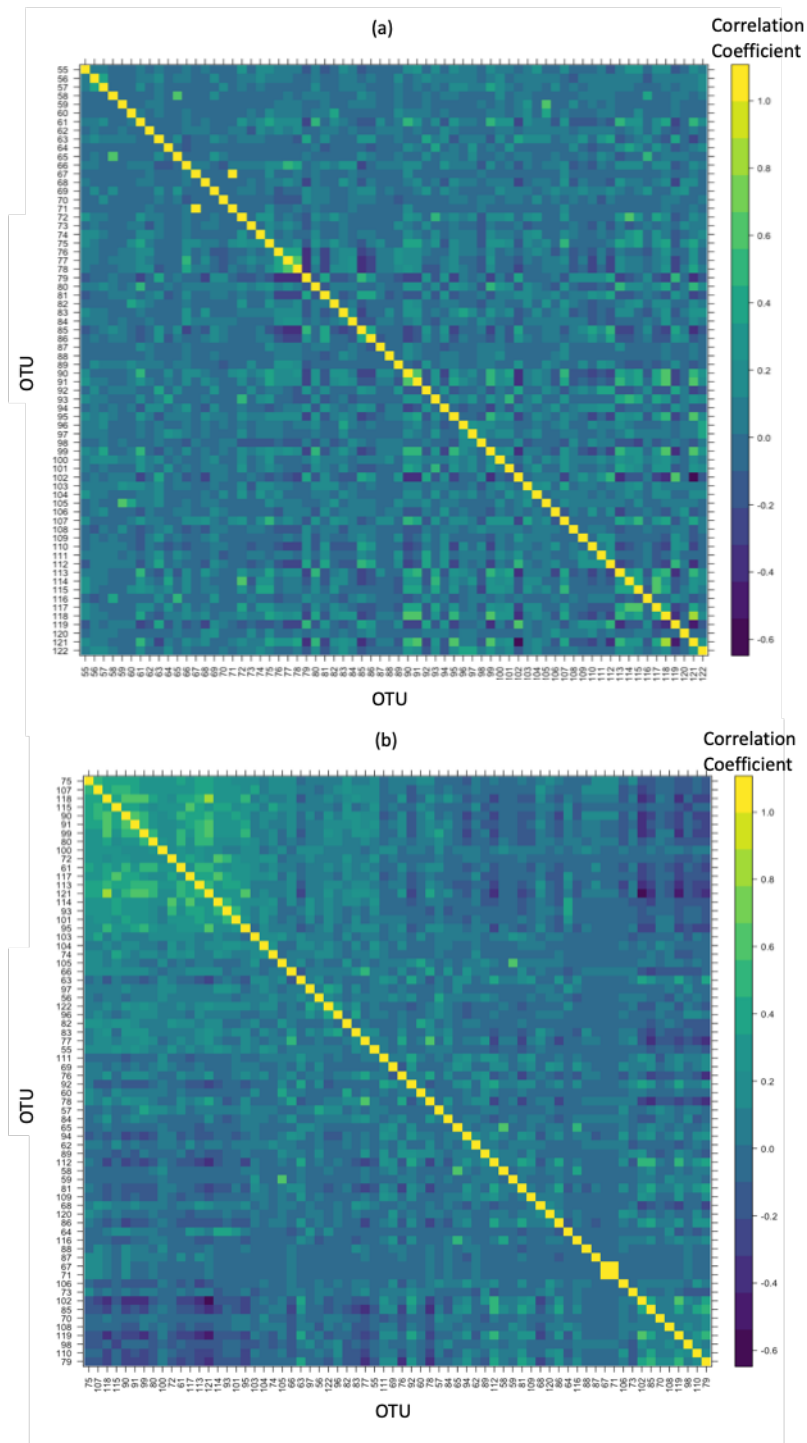

Supplementary Figure 16: Heatmaps for the Spearman rank of the OTUs in the cluster, Phylum Firmicutes, (a) before ordering and (b) after the ordering based on correlation correlation of the OTUs in the Cirrhosis study

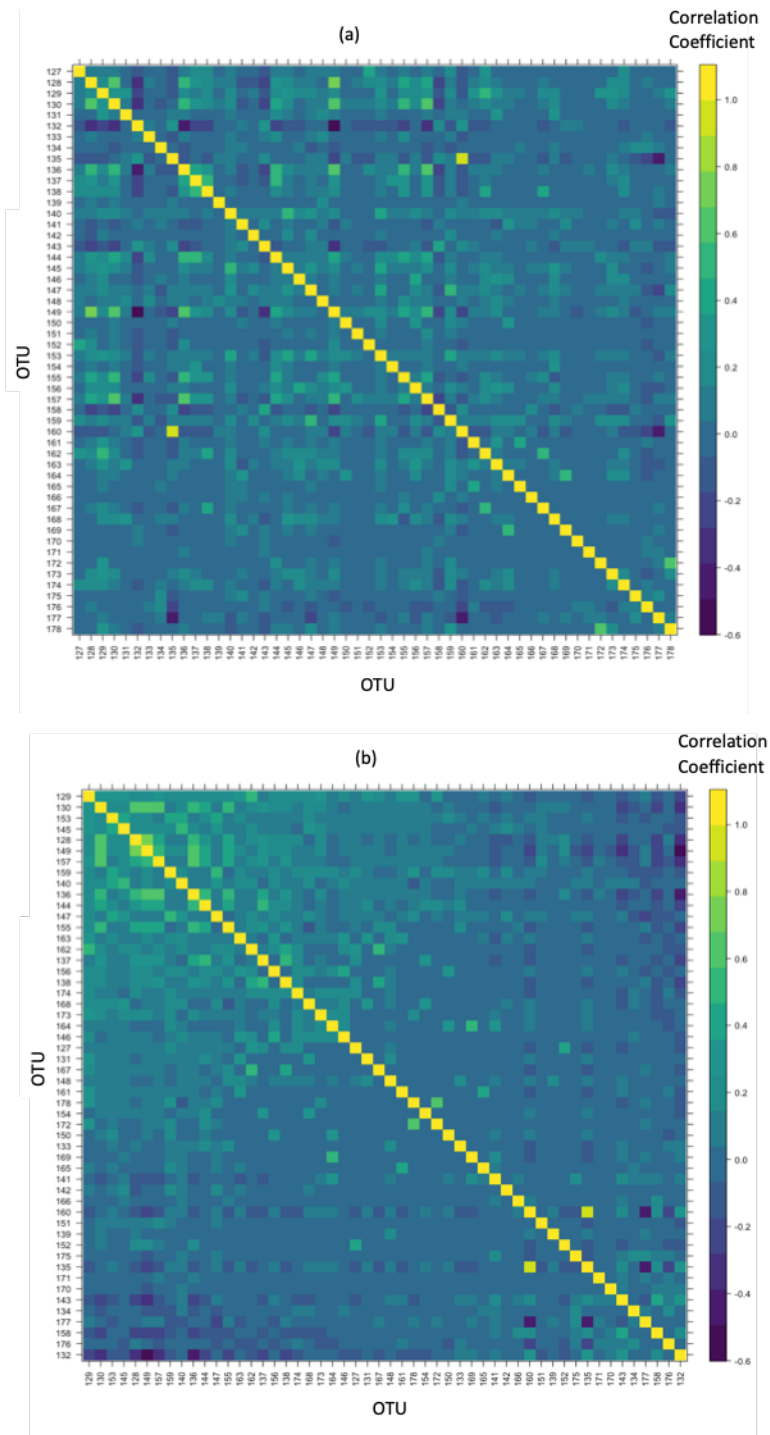

Supplementary Figure 17: Heatmaps for the Spearman rank of the OTUs in the cluster, Phylum Proteobacteria, (a) before ordering and (b) after the ordering based on correlation correlation of the OTUs in the Cirrhosis study

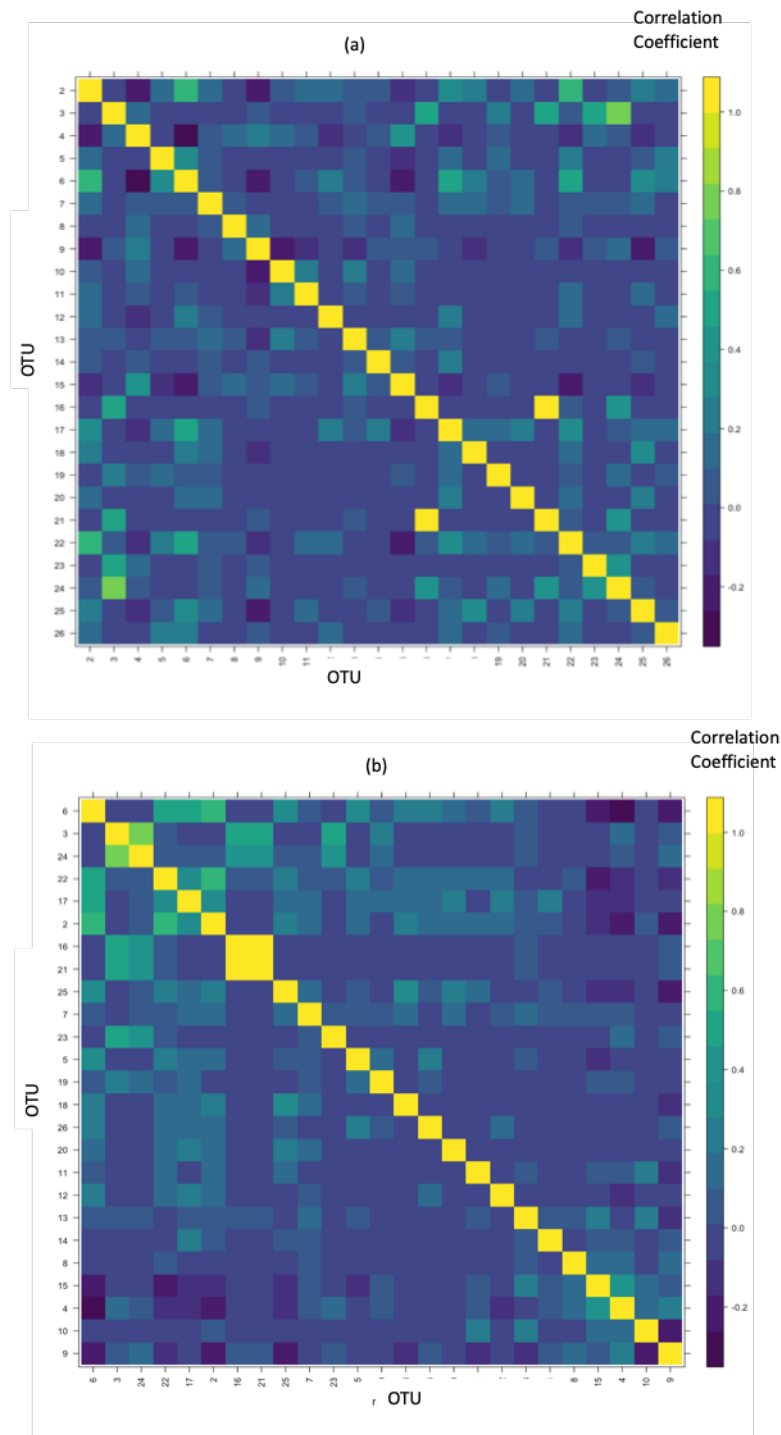

Supplementary Figure 18: Heatmaps for the Spearman rank of the OTUs in the cluster, Phylum Actinobacteria, (a) before ordering and (b) after the ordering based on correlation correlation of the OTUs in the Cirrhosis study

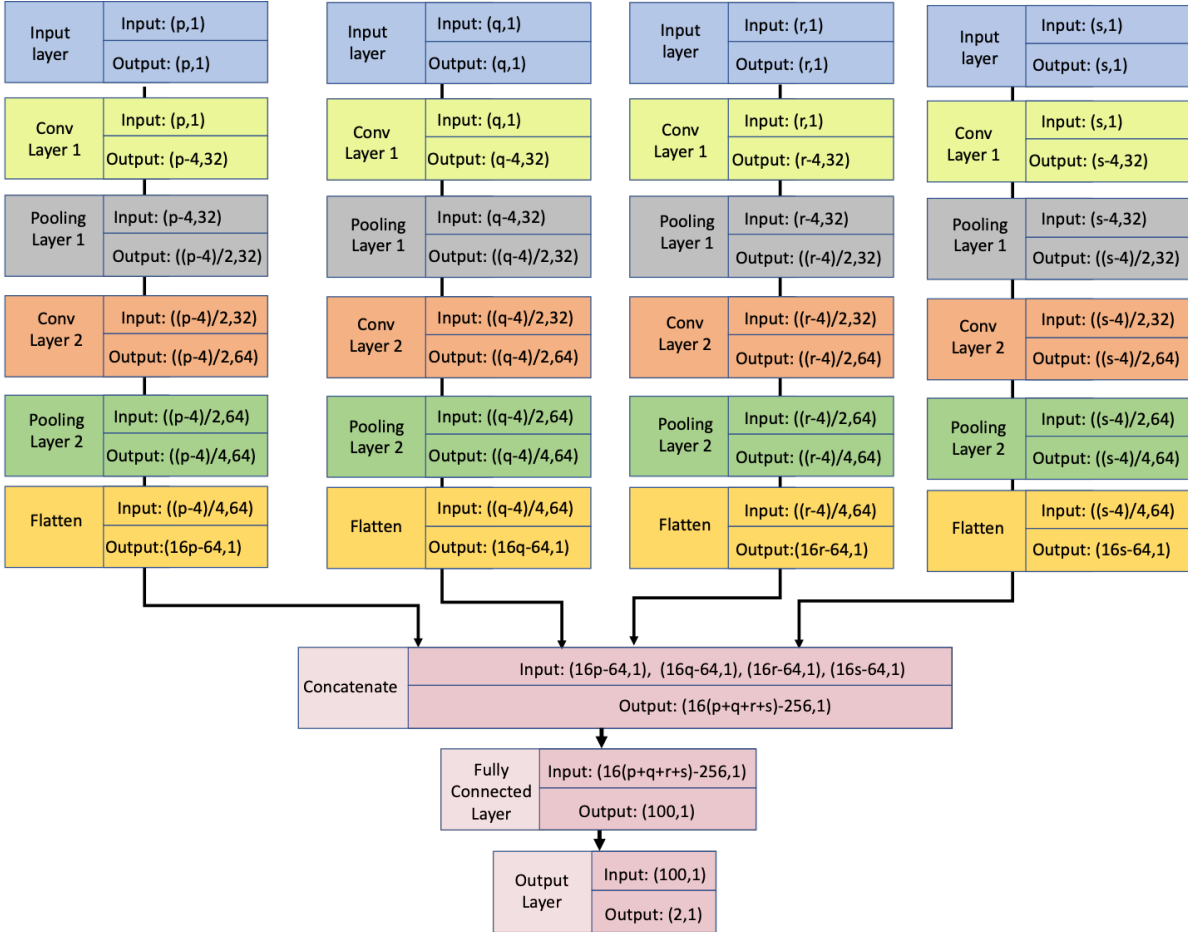

Supplementary Figure 19: Functional working of the layers of *taxoNN* on 4 clusters of an example dataset containing 'p', 'q', 'r' and 's' OTUs in the respective clusters (where  $p+q+r+s = N$ ). Each block corresponds to a layer acting on the cluster. Input signifies the dimension of the input to the layer. The input at each step is represented as (k,l) where, 'k' is the number of rows in the input and 'l' represents the number of columns. As the initial input was a vector therefore, l in this case was '1'. Output signifies the dimension of the result after certain operations in that particular layer. Further, as the number of filters increases from 32 in the first Conv layer to 64 in the second Conv layer, the number of columns in the nodes vary from 32 to 64. Finally, in the concatenation step we obtain a single column concatenation vector by stacking flattened vectors from all clusters together.

### 3 References

- [1] Qin, J. *et al.* A metagenome-wide association study of gut microbiota in type 2 diabetes. *Nature* **490**, 55–60 (2012).
- [2] Qin, N. *et al.* Alterations of the human gut microbiome in liver cirrhosis. *Nature* **513**, 59–64 (2014).
- [3] Turpin, W. *et al.* Association of host genome with intestinal microbial composition in a large healthy cohort. *Nature Genetics* **48**, 1413–1417 (2016).
- [4] Krizhevsky, A., Sutskever, I. & Hinton, G. E. Imagenet classification with deep convolutional neural networks. In *Advances in Neural Information Processing Systems*, 1097–1105 (2012).
- [5] Karlsson, F. H. *et al.* Gut metagenome in european women with normal, impaired and diabetic glucose control. *Nature* **498**, 99–103 (2013).
